# Supplementary material for: Amidoxime platinum(ii) complexes: pH-dependent highly selective generation and cytotoxic activity
Source: Royal Society of Chemistry journal article supplement (doi:10.1039/c7nj00982h), 2017-01-01
Supplement: c7nj00982h1.pdf [file c7nj00982h1.pdf]

## Electronic Supporting Information

### Table of Contents

|                                                                                      |    |
|--------------------------------------------------------------------------------------|----|
| Characterization of <b>3a–b</b> and <b>3d–f</b> .....                                | 2  |
| Characterization of <b>4c–g</b> .....                                                | 5  |
| Spectra of <b>3a–b</b> and <b>3d–f</b> .....                                         | 8  |
| Spectra of <b>4c–g</b> .....                                                         | 23 |
| Crystal data for <b>3a–b</b> and <b>3d–e</b> .....                                   | 35 |
| Crystal data for <b>3f</b> , <b>4c</b> , <b>4f</b> and $[2cH][PtCl_3(Me_2SO)]$ ..... | 36 |
| Concentration-effect curves of <b>3b</b> , <b>3d–e</b> and <b>4c–e</b> .....         | 37 |

### Characterization of 3a–b and 3d–f

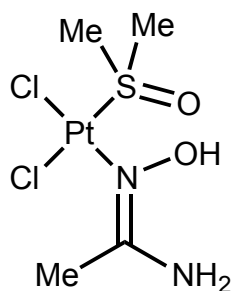

**3a.** Yield: 96% (80.3 mg). Mp: 142 °C (dec). Anal. Calcd for C<sub>4</sub>H<sub>12</sub>N<sub>2</sub>Cl<sub>2</sub>O<sub>2</sub>PtS: C, 11.49; H, 2.89; N, 6.70. Found: C, 11.68; H, 2.74; N, 6.88. HRESI<sup>+</sup>-MS (MeOH, *m/z*): 346.0153 ([M – 2Cl – H]<sup>+</sup>, calcd 346.0183), 382.9909 ([M – Cl]<sup>+</sup>, calcd 382.9937), 440.9490 ([M + Na]<sup>+</sup>, calcd 440.9515), 800.9536 ([2M – Cl]<sup>+</sup>, calcd 800.9561), 858.9113 ([2M + Na]<sup>+</sup>, calcd 858.9142). IR (KBr, selected bonds, cm<sup>-1</sup>): 3480(m-s), 3366(s), 3215(s) ν(O–H) and ν(N–H); 2998(m), 2926(w-m), 2785(w) ν(C–H); 1663(vs) ν(C=N); 1105(vs) ν(S=O). <sup>1</sup>H NMR (CD<sub>3</sub>OD, δ): 3.45 (s, br, 6H, S(CH<sub>3</sub>)<sub>2</sub>), 2.36 (s, 3H, CH<sub>3</sub>). <sup>13</sup>C{<sup>1</sup>H} NMR (CD<sub>3</sub>OD, δ): 158.29 (C(NH<sub>2</sub>)=NOH), 43.20 (s, CH<sub>3</sub>), 42.96 (s, CH<sub>3</sub>), 17.64 (CH<sub>3</sub>). Crystals of **3a** suitable for X-ray diffraction were obtained by the slow evaporation of MeOH solution at RT in air.

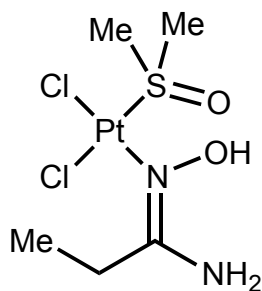

**3b.** Yield: 83% (71.8 mg). Mp: 160 °C (dec). Anal. Calcd for C<sub>5</sub>H<sub>14</sub>N<sub>2</sub>Cl<sub>2</sub>O<sub>2</sub>PtS: C, 13.89; H, 3.26; N, 6.48. Found: C, 13.89; H, 3.12; N, 6.54. HRESI<sup>+</sup>-MS (MeOH, *m/z*): 360.0320 ([M – 2Cl – H]<sup>+</sup>, calcd 360.0340), 418.9885 ([M – Cl – H + Na]<sup>+</sup>, calcd 418.9913), 454.9648 ([M + Na]<sup>+</sup>, calcd 454.9672), 812.9913 ([2M – 2Cl – 2H + Na]<sup>+</sup>, calcd 812.9937), 886.9433 ([2M + Na]<sup>+</sup>, calcd 886.9456), 1245.9653 ([3M – 2Cl – 2H + Na]<sup>+</sup>, calcd 1245.9721). IR (KBr, selected bonds, cm<sup>-1</sup>): 3462(s), 3378(vs), 3233(s) ν(O–H) and ν(N–H); 3009(w-m), 2914(w-m), 2803(w) ν(C–H); 1659(vs) ν(C=N); 1117(s) ν(S=O). <sup>1</sup>H NMR (CD<sub>3</sub>OD, δ): 3.46 (s, 3H, CH<sub>3</sub>), 3.44 (s, 3H, CH<sub>3</sub>),

2.92–2.76 (m, 2H,  $CH_2$ ), 1.32 (t, 3H,  $CH_3$ ).  $^{13}C\{^1H\}$  NMR ( $CD_3OD$ ,  $\delta$ ): 162.29 ( $C(NH_2)=NOH$ ), 43.31 (s,  $CH_3$ ), 42.98 (s,  $CH_3$ ), 26.08 ( $CH_2$ ), 10.17 ( $CH_3$ ). Crystals of **3b** suitable for X-ray diffraction were obtained by the slow evaporation of MeOH solution at RT in air.

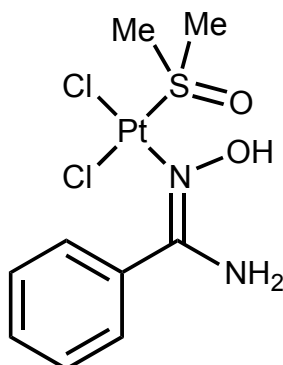

**3d**. Yield: 92% (88.4 mg). Mp: 149 °C (dec). Anal. Calcd for  $C_9H_{14}N_2Cl_2O_2PtS$ : C, 22.51; H, 2.94; N, 5.83. Found: C, 22.58; H, 2.88; N, 5.84. HRESI<sup>+</sup>-MS (MeOH,  $m/z$ ): 408.0325 ( $[M - 2Cl - H]^+$ , calcd 408.0341), 445.0087 ( $[M - Cl]^+$ , calcd 445.0095), 502.9661 ( $[M + Na]^+$ , calcd 502.9674), 518.9390 ( $[M + K]^+$ , calcd 518.9412), 924.9872 ( $[2M - Cl]^+$ , calcd 924.9878), 982.9455 ( $[2M + Na]^+$ , calcd 982.9459), 998.9189 ( $[2M + K]^+$ , calcd 998.9198). IR (KBr, selected bonds,  $cm^{-1}$ ): 3451(s), 3320(s)  $\nu(O-H)$  and  $\nu(N-H)$ ; 3187(m), 3005(w-m), 2924(w)  $\nu(C-H)$ ; 1655(vs)  $\nu(C=N)$ ; 1138(m)  $\nu(S=O)$ .  $^1H$  NMR ( $CD_3OD$ ,  $\delta$ ): 8.02 (d, 2H,  $CH$ ), 7.63 (t, 1H,  $CH$ ), 7.57 (t, 2H,  $CH$ ), 3.37 (s, 3H,  $CH_3$ ), 2.59 (s, 3H,  $CH_3$ ).  $^{13}C\{^1H\}$  NMR ( $CD_3OD$ ,  $\delta$ ): 159.05 ( $C(NH_2)=NOH$ ), 132.46 ( $C-C(NH_2)=NOH$ ), 130.74 ( $p-C$ ), 129.60, 127.83 ( $o-$  and  $m-C$ ), 42.95 ( $CH_3$ ), 42.48 ( $CH_3$ ). Crystals of **3d**•MeOH suitable for X-ray diffraction were obtained by the slow evaporation of MeOH solution at RT in air.

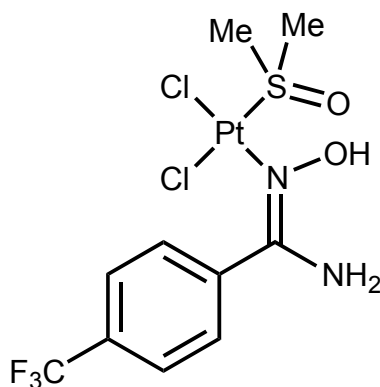

**3e**·½H<sub>2</sub>O. Yield: 97% (108.1 mg). Mp: 185 °C (dec). Anal. Calcd for C<sub>10</sub>H<sub>13</sub>N<sub>2</sub>Cl<sub>2</sub>F<sub>3</sub>O<sub>2</sub>PtS·½H<sub>2</sub>O: C, 21.55; H, 2.53; N, 5.03. Found: C, 21.48; H, 2.70; N, 5.01. HRESI<sup>+</sup>-MS (MeOH, *m/z*): 476.0230 ([M – 2Cl – H]<sup>+</sup>, calcd 476.0215), 512.9982 ([M – Cl]<sup>+</sup>, calcd 512.9970), 570.9570 ([M + Na]<sup>+</sup>, calcd 570.9548), 1060.9621 ([2M – Cl]<sup>+</sup>, calcd 1060.9627), 1118.9207 ([2M + Na]<sup>+</sup>, calcd 1118.9208), 1134.8940 ([2M + K]<sup>+</sup>, calcd 1134.8946). IR (KBr, selected bonds, cm<sup>-1</sup>): 3451(s), 3342(s) ν(O–H) and ν(N–H); 3185(w-m), 3027(w), 3002(w), 2920(w-m) ν(C–H); 1661(vs) ν(C=N); 1138(s) ν(S=O). <sup>1</sup>H NMR (CD<sub>3</sub>OD, δ): 8.17 (d, 2H, CH), 7.90 (d, 2H, CH), 3.41 (s, 3H, CH<sub>3</sub>), 2.73 (s, 3H, CH<sub>3</sub>). <sup>13</sup>C{<sup>1</sup>H} NMR (CD<sub>3</sub>OD, δ): 157.89 (s, C(NH<sub>2</sub>)=NOH), 136.24 (s, C–C(NH<sub>2</sub>)=NOH), 132.30 (q, *J*<sub>CF</sub> = 32 Hz, C–CF<sub>3</sub>), 130.44 (s, C–C–C–CF<sub>3</sub>), 124.71 (q, *J*<sub>CF</sub> = 4 Hz, C–C–CF<sub>3</sub>), 123.88 (q *J*<sub>CF</sub> = 272 Hz, CF<sub>3</sub>), 43.11 (s, CH<sub>3</sub>), 42.55 (s, CH<sub>3</sub>). Crystals of **3e** suitable for X-ray diffraction were obtained by the slow evaporation of MeOH solution at RT in air.

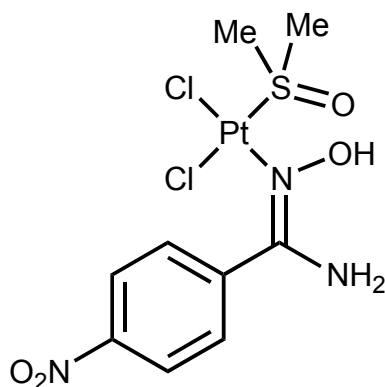

**3f**. Yield: 98% (102.9 mg). Mp: 183 °C (dec). Anal. Calcd for C<sub>9</sub>H<sub>13</sub>N<sub>3</sub>Cl<sub>2</sub>O<sub>4</sub>PtS: C, 21.65; H, 3.52; N, 6.39. Found: C, 21.73; H, 3.41; N, 6.48. HRESI<sup>+</sup>-MS (MeOH, *m/z*): 453.0172 ([M – 2Cl – H]<sup>+</sup>, calcd 453.0191), 489.9923 ([M – Cl]<sup>+</sup>, calcd 489.9946), 547.9517 ([M + Na]<sup>+</sup>, calcd 547.9524), 1014.9577 ([2M – Cl]<sup>+</sup>, calcd 1014.9580), 1072.9157 ([2M + Na]<sup>+</sup>, calcd 1072.9161). IR (KBr, selected bonds, cm<sup>-1</sup>): 3439(s), 3335(s) ν(O–H) and ν(N–H); 3185(m), 3107(w), 3079(w), 3001(w-m), 2918(w-m) ν(C–H); 1661(vs) ν(C=N); 1520(vs) ν(N=O)<sub>as</sub>; 1346(vs) ν(N=O)<sub>s</sub>; 1136(s) ν(S=O). <sup>1</sup>H NMR (CD<sub>3</sub>OD, δ): 8.43 (d, 2H, CH), 8.19 (d, 2H, CH), 3.42 (s, 3H, CH<sub>3</sub>), 2.83 (s, 3H, CH<sub>3</sub>). CP-MAS TOSS <sup>13</sup>C{<sup>1</sup>H} NMR (δ): 155.19 (C(NH<sub>2</sub>)=NOH), 149.60, 148.08, 146.40, 138.11, 133.02, 129.73, 123.36, 122.12 (Ar), 46.59, 44.17, 42.66, 40.18 (s, CH<sub>3</sub>). Crystals of **3f** suitable for X-ray diffraction were obtained by the slow evaporation of MeNO<sub>2</sub> solution at RT in air.

### Characterization of 4c–g

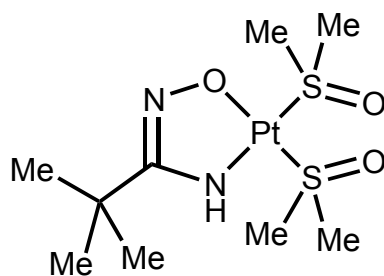

**4c.** Yield: 86% (80.1 mg). Mp: 189 °C (dec). Anal. Calcd for C<sub>9</sub>H<sub>22</sub>N<sub>2</sub>O<sub>3</sub>PtS<sub>2</sub>: C, 23.22; H, 4.76; N, 6.02. Found: C, 23.04; H, 4.71; N, 6.09. HRESI<sup>+</sup>-MS (MeOH, *m/z*): 466.0783 ([M + H]<sup>+</sup>, calcd 466.0793). IR (KBr, selected bonds, cm<sup>-1</sup>): 3420(w-m), 3360(m), 3295(m) ν(N–H); 3003(m), 2969(m), 2913(m), 2870(w) ν(C–H); 1630(w) ν(C=N); 1126(vs) ν(S=O). <sup>1</sup>H NMR (CDCl<sub>3</sub>, δ): 4.85 (s+d, *J*<sub>PtH</sub> = 112 Hz, br, 1H, NH), 3.51 (s+d, *J*<sub>PtH</sub> = 17 Hz, 6H, S(CH<sub>3</sub>)<sub>2</sub>), 3.48 (s+d, *J*<sub>PtH</sub> = 15 Hz, 6H, S(CH<sub>3</sub>)<sub>2</sub>), 1.31 (s, 9H, C(CH<sub>3</sub>)<sub>3</sub>). <sup>13</sup>C {<sup>1</sup>H} NMR (CDCl<sub>3</sub>, δ): 168.94 (s, C(NH)=NO), 47.02 (s+d, *J*<sub>PtC</sub> = 36 Hz, S(CH<sub>3</sub>)<sub>2</sub>), 46.32 (s+d, *J*<sub>PtC</sub> = 34 Hz, S(CH<sub>3</sub>)<sub>2</sub>), 32.26 (s, C(CH<sub>3</sub>)<sub>3</sub>), 29.88 (s, C(CH<sub>3</sub>)<sub>3</sub>). Crystals of **4c** suitable for X-ray diffraction were obtained by the slow evaporation of MeNO<sub>2</sub> solution at RT in air.

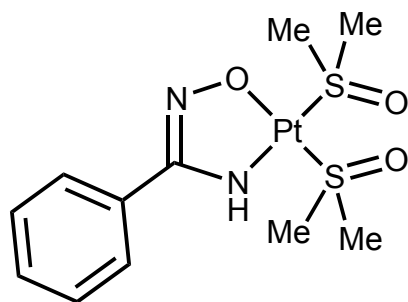

**4d**•H<sub>2</sub>O. Yield: 74% (74.5 mg). Mp: 190 °C (dec). Anal. Calcd for C<sub>11</sub>H<sub>18</sub>N<sub>2</sub>O<sub>3</sub>PtS<sub>2</sub>•H<sub>2</sub>O: C, 26.24; H, 4.00; N, 5.56. Found: C, 26.03; H, 3.94; N, 5.60. HRESI<sup>+</sup>-MS (*m/z*): 486.0399 ([M + H]<sup>+</sup>, calcd 486.0480). IR (KBr, selected bonds, cm<sup>-1</sup>): 3337(m) ν(N–H); 2986(m), 2909(w-m) ν(C–H); 1638(w) ν(C=N); 1126(vs) ν(S=O). <sup>1</sup>H NMR (CDCl<sub>3</sub>, δ): 7.77–7.73 (m, 2H, *o*-CH), 7.36–7.32 (m, 3H, *m*-, *p*-CH), 5.52 (s+d, *J*<sub>PtH</sub> = 112 Hz, br, 1H, NH), 3.56 (s+d, *J*<sub>PtH</sub> = 24 Hz, 6H, S(CH<sub>3</sub>)<sub>2</sub>), 3.54 (s+d, *J*<sub>PtH</sub> = 24 Hz, 6H, S(CH<sub>3</sub>)<sub>2</sub>). <sup>13</sup>C {<sup>1</sup>H} NMR (CDCl<sub>3</sub>, δ): 161.46 (s, C(NH)=NO), 130.50 (s, C–

C(NH)=NO), 128.45 (s, *p*-CH), 128.29, 126.74 (2s, *o*-, *m*-CH), 47.01 (s+d,  $J_{\text{PtC}} = 38$  Hz, S(CH<sub>3</sub>)<sub>2</sub>), 46.23 (s+d,  $J_{\text{PtC}} = 34$  Hz, S(CH<sub>3</sub>)<sub>2</sub>).

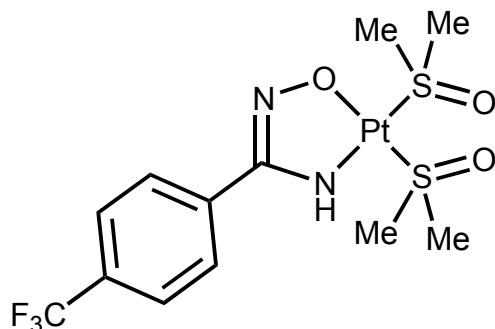

**4e**•H<sub>2</sub>O. Yield: 78% (89.2 mg). Mp: 213 °C (dec). Anal. Calcd for C<sub>12</sub>H<sub>17</sub>N<sub>2</sub>F<sub>3</sub>O<sub>3</sub>PtS<sub>2</sub>•H<sub>2</sub>O: C, 25.22; H, 3.35; N, 4.90. Found: C, 25.13; H, 3.51; N, 4.98. HRESI<sup>+</sup>-MS (*m/z*): 476.0206 ([M – Me<sub>2</sub>SO + H]<sup>+</sup>, calcd 476.0215), 554.0364 ([M + H]<sup>+</sup>, calcd 554.0354). IR (KBr, selected bonds, cm<sup>-1</sup>): 3337(m) ν(N–H); 3013(w-m), 2990(m), 2911(m) ν(C–H); 1618(m) ν(C=N); 1123(vs) ν(S=O). <sup>1</sup>H NMR (CDCl<sub>3</sub>, δ): 7.86 (d, 2H, CH), 7.59 (d, 2H, CH), 5.26 (s+d,  $J_{\text{PtH}} = 108$  Hz, br, 1H, NH), 3.57 (s+d,  $J_{\text{PtH}} = 20$  Hz, 6H, S(CH<sub>3</sub>)<sub>2</sub>), 3.54 (s+d,  $J_{\text{PtH}} = 20$  Hz, 6H, S(CH<sub>3</sub>)<sub>2</sub>). <sup>13</sup>C{<sup>1</sup>H} NMR (CDCl<sub>3</sub>, δ): 160.26 (s, C(NH)=NO), 133.90 (s, C–C(NH)=NO), 130.21 (q,  $J_{\text{CF}} = 32$  Hz, C–CF<sub>3</sub>), 126.82 (s, C–C–C–CF<sub>3</sub>), 125.30 (q,  $J_{\text{CF}} = 4$  Hz, C–C–CF<sub>3</sub>), 124.18 (q  $J_{\text{CF}} = 272$  Hz, CF<sub>3</sub>), 46.97 (s+d,  $J_{\text{PtC}} = 39$  Hz, S(CH<sub>3</sub>)<sub>2</sub>), 46.33 (s+d,  $J_{\text{PtC}} = 32$  Hz, S(CH<sub>3</sub>)<sub>2</sub>).

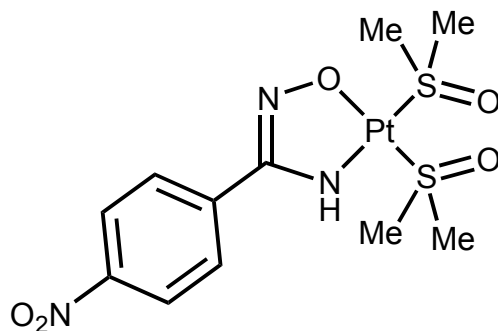

**4f**•H<sub>2</sub>O. Yield: 95% (104.1 mg). Mp: 210 °C (dec). Anal. Calcd for C<sub>11</sub>H<sub>17</sub>N<sub>3</sub>O<sub>5</sub>PtS<sub>2</sub>•H<sub>2</sub>O: C, 24.09; H, 3.49; N, 7.66. Found: C, 23.99; H, 3.54; N, 7.65. HRESI<sup>+</sup>-MS (*m/z*): 531.0306 ([M + H]<sup>+</sup>, calcd 531.0331), 553.0104 ([M + Na]<sup>+</sup>, calcd 553.0150). IR (KBr, selected bonds, cm<sup>-1</sup>): 3414(m), 3335(m) ν(N–H); 2990(m), 2913(m) ν(C–H); 1597(m) ν(C=N); 1516(m-s) ν(N=O)<sub>as</sub>; 1341(s) ν(N=O)<sub>s</sub>; 1130(vs) ν(S=O). <sup>1</sup>H NMR (CDCl<sub>3</sub>, δ): 8.20 (d, 2H, CH), 7.92 (d, 2H, CH), 5.27 (s+d,

$J_{\text{PtH}} = 108 \text{ Hz}$ , br, 1H, *NH*), 3.58 (s+d,  $J_{\text{PtH}} = 20 \text{ Hz}$ , 6H,  $\text{S}(\text{CH}_3)_2$ ), 3.55 (s+d,  $J_{\text{PtH}} = 20 \text{ Hz}$ , 6H,  $\text{S}(\text{CH}_3)_2$ ). CP-MAS TOSS  $^{13}\text{C}\{^1\text{H}\}$  NMR ( $\text{CDCl}_3$ ,  $\delta$ ): 161.75 ( $\text{C}(\text{NH})=\text{NO}$ ), 148.61, 145.56, 135.64, 123.33 (Ar), 45.47 ( $\text{S}(\text{CH}_3)_2$ ), 41.01 ( $\text{S}(\text{CH}_3)_2$ ). Crystals of **4f** suitable for X-ray diffraction were obtained by the slow evaporation of MeOH solution at RT in air.

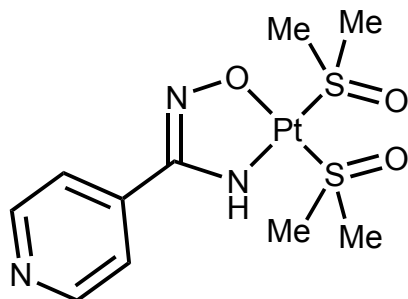

**4g**· $\text{H}_2\text{O}$ . Yield: 91% (91.7 mg). Mp: 218 °C (dec). Anal. Calcd for  $\text{C}_{10}\text{H}_{17}\text{N}_3\text{O}_3\text{PtS}_2\cdot\text{H}_2\text{O}$ : C, 23.81; H, 3.80; N, 8.33. Found: C, 23.76; H, 3.84; N, 8.30. HRESI<sup>+</sup>-MS ( $m/z$ ): 487.0412 ( $[\text{M} + \text{H}]^+$ , calcd 487.0432), 509.0210 ( $[\text{M} + \text{Na}]^+$ , calcd 509.0252). IR (KBr, selected bonds,  $\text{cm}^{-1}$ ): 3422(m)  $\nu(\text{N}-\text{H})$ ; 2994(w-m), 2913(w-m)  $\nu(\text{C}-\text{H})$ ; 1597(m)  $\nu(\text{C}=\text{N})$ ; 1130(s)  $\nu(\text{S}=\text{O})$ .  $^1\text{H}$  NMR ( $\text{CDCl}_3$ ,  $\delta$ ): 8.59 (d, 2H, *CH*), 7.62 (d, 2H, *CH*), 5.28 (s+d,  $J_{\text{PtH}} = 88 \text{ Hz}$ , br, 1H, *NH*), 3.58 (s+d,  $J_{\text{PtH}} = 12 \text{ Hz}$ , 6H,  $\text{S}(\text{CH}_3)_2$ ), 3.54 (s+d,  $J_{\text{PtH}} = 12 \text{ Hz}$ , 6H,  $\text{S}(\text{CH}_3)_2$ ).  $^{13}\text{C}\{^1\text{H}\}$  NMR ( $\text{CDCl}_3$ ,  $\delta$ ): 159.19 ( $\text{C}(\text{NH})=\text{NO}$ ), 150.04 (*CH*), 137.71 ( $\text{C}-\text{C}(\text{NH})=\text{NO}$ ), 120.76 (*CH*), 46.96 ( $\text{S}(\text{CH}_3)_2$ ), 46.39 ( $\text{S}(\text{CH}_3)_2$ ).

## Spectra of 3a–b and 3d–f

3a

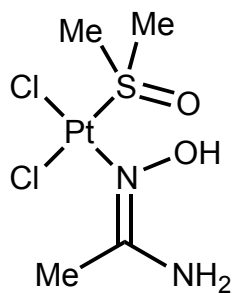

### Acquisition Parameter

|             |            |                      |          |                  |           |
|-------------|------------|----------------------|----------|------------------|-----------|
| Source Type | ESI        | Ion Polarity         | Positive | Set Nebulizer    | 0.4 Bar   |
| Focus       | Not active |                      |          | Set Dry Heater   | 180 °C    |
| Scan Begin  | 50 m/z     | Set Capillary        | 4500 V   | Set Dry Gas      | 4.0 l/min |
| Scan End    | 3000 m/z   | Set End Plate Offset | -500 V   | Set Divert Valve | Source    |

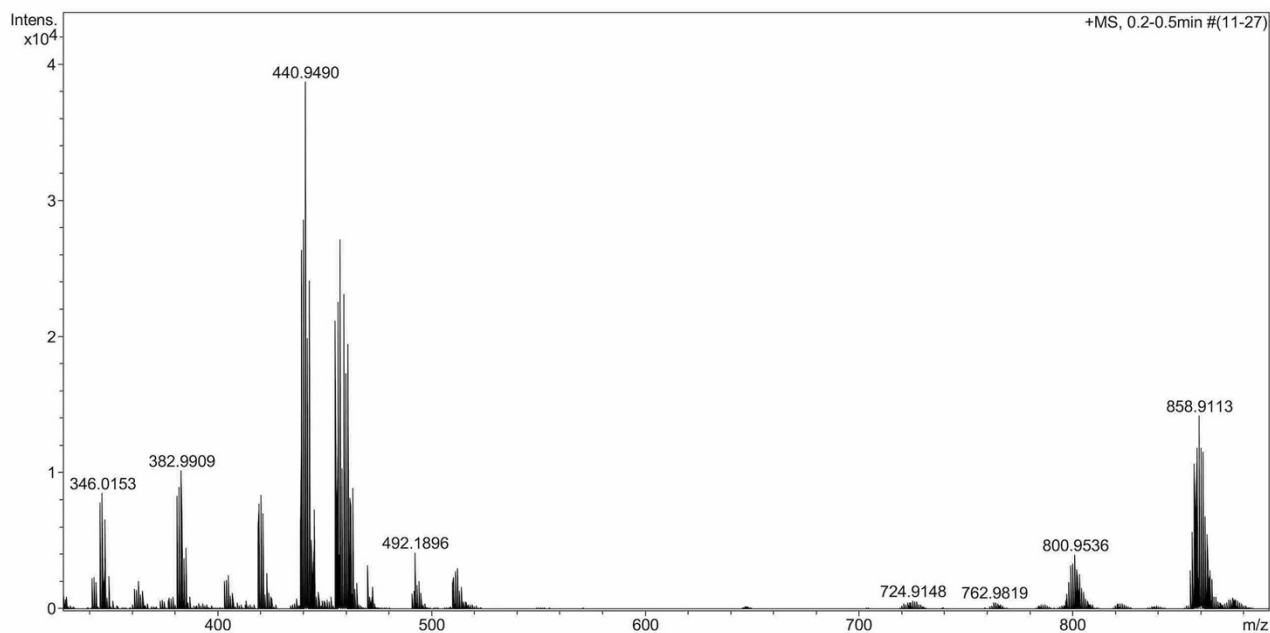

Figure S1. HR ESI<sup>+</sup>-MS spectrum of 3a.



**Acquisition Parameter**

|             |            |                      |          |                  |           |
|-------------|------------|----------------------|----------|------------------|-----------|
| Source Type | ESI        | Ion Polarity         | Positive | Set Nebulizer    | 0.4 Bar   |
| Focus       | Not active |                      |          | Set Dry Heater   | 180 °C    |
| Scan Begin  | 50 m/z     | Set Capillary        | 4500 V   | Set Dry Gas      | 4.0 l/min |
| Scan End    | 3000 m/z   | Set End Plate Offset | -500 V   | Set Divert Valve | Source    |

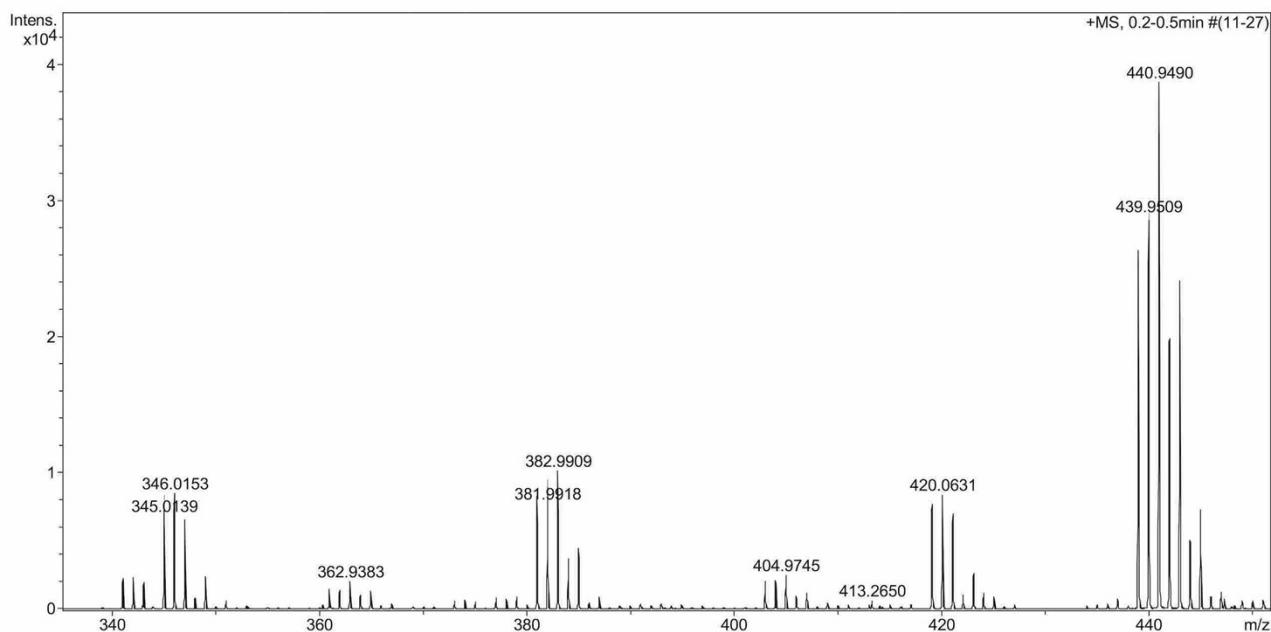

**Figure S2.** HR ESI<sup>+</sup>-MS spectrum of **3a** (low region).

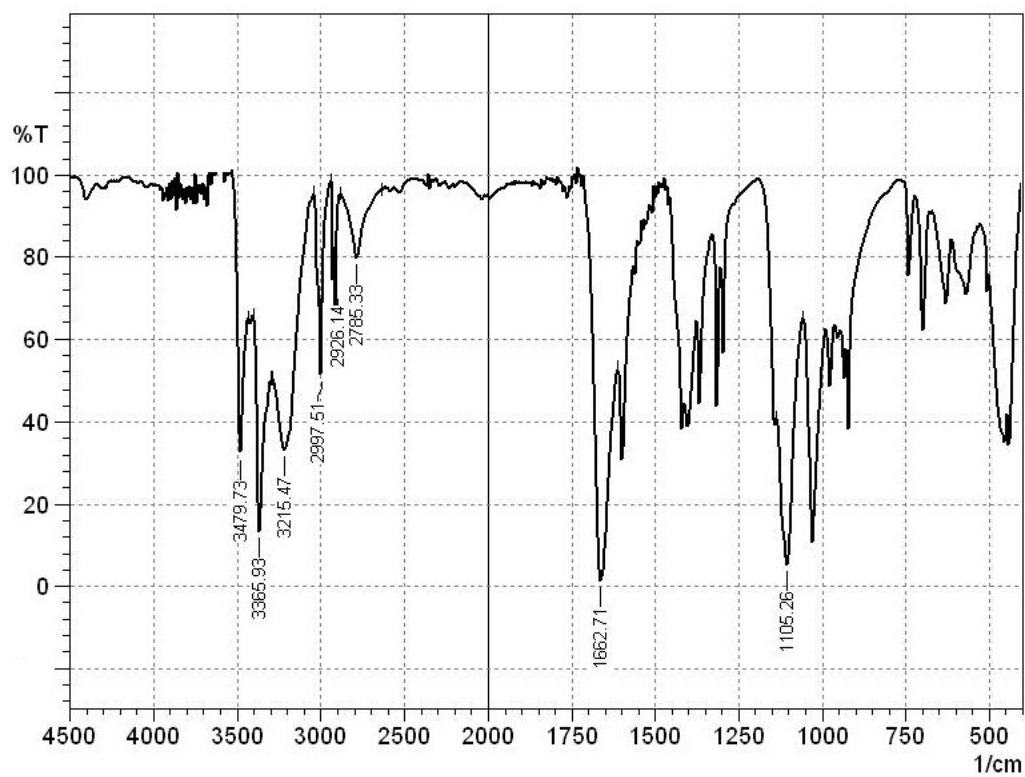

**Figure S3.** IR spectrum of **3a**.

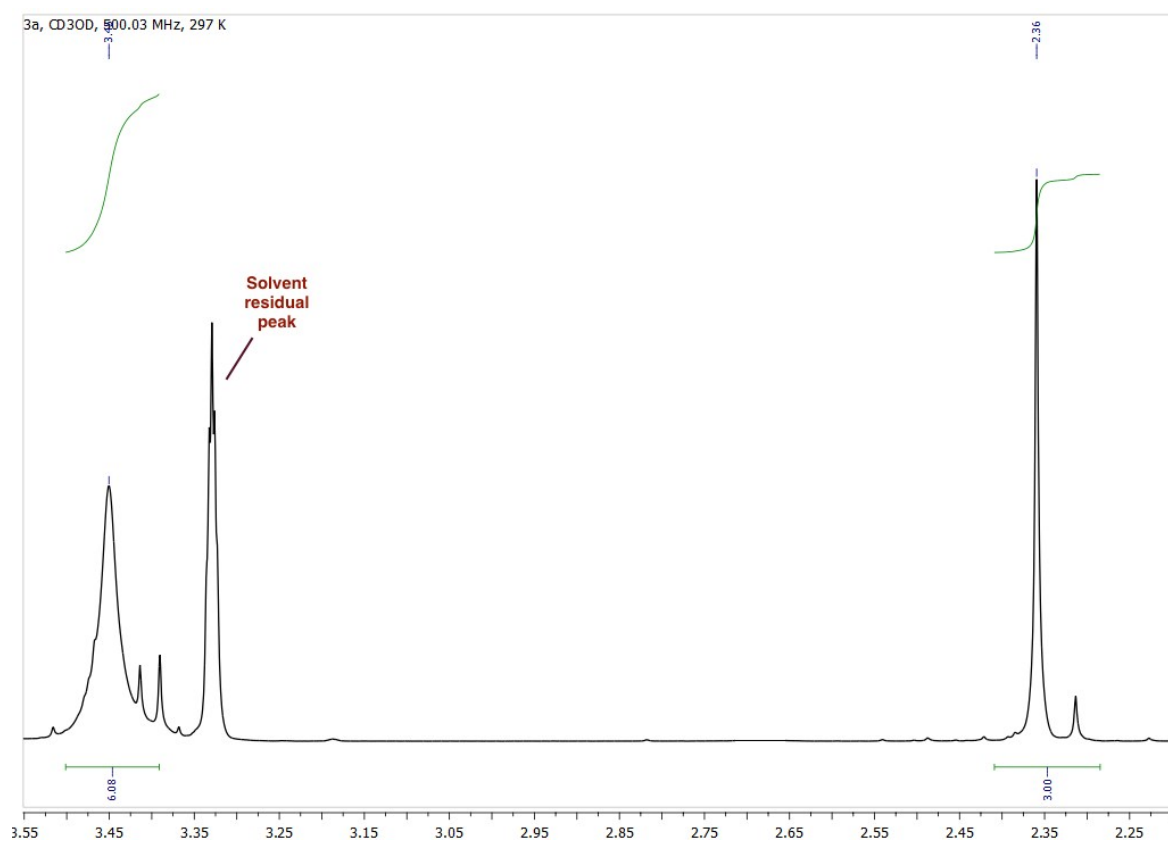

Figure S4.  $^1\text{H}$  NMR spectrum of **3a**.

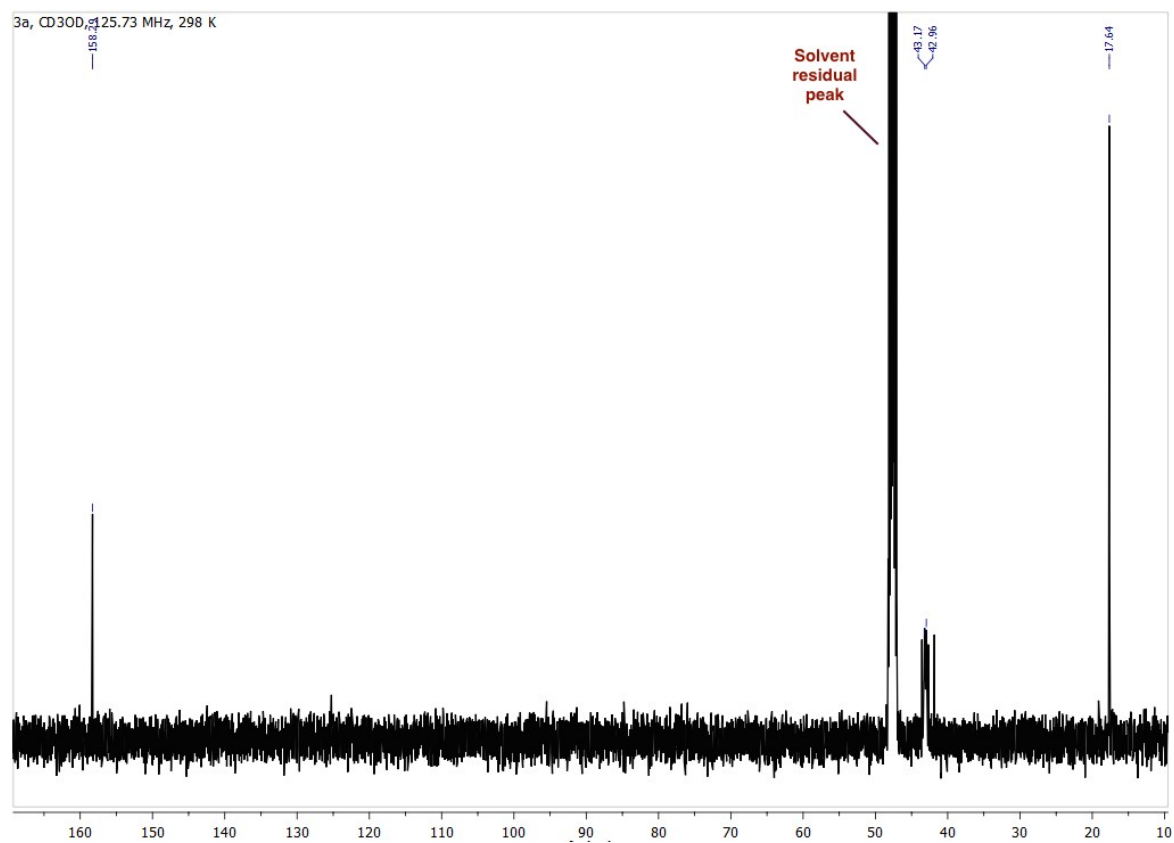

Figure S5.  $^{13}\text{C}\{^1\text{H}\}$  NMR spectrum of **3a**.

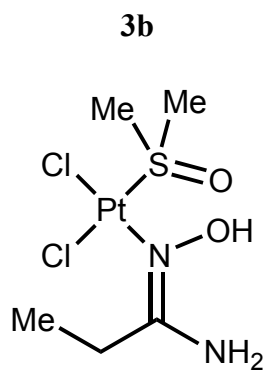

**Acquisition Parameter**

|             |            |                      |          |                  |           |
|-------------|------------|----------------------|----------|------------------|-----------|
| Source Type | ESI        | Ion Polarity         | Positive | Set Nebulizer    | 0.4 Bar   |
| Focus       | Not active | Set Capillary        | 4500 V   | Set Dry Heater   | 180 °C    |
| Scan Begin  | 50 m/z     | Set End Plate Offset | -500 V   | Set Dry Gas      | 4.0 l/min |
| Scan End    | 3000 m/z   |                      |          | Set Divert Valve | Source    |

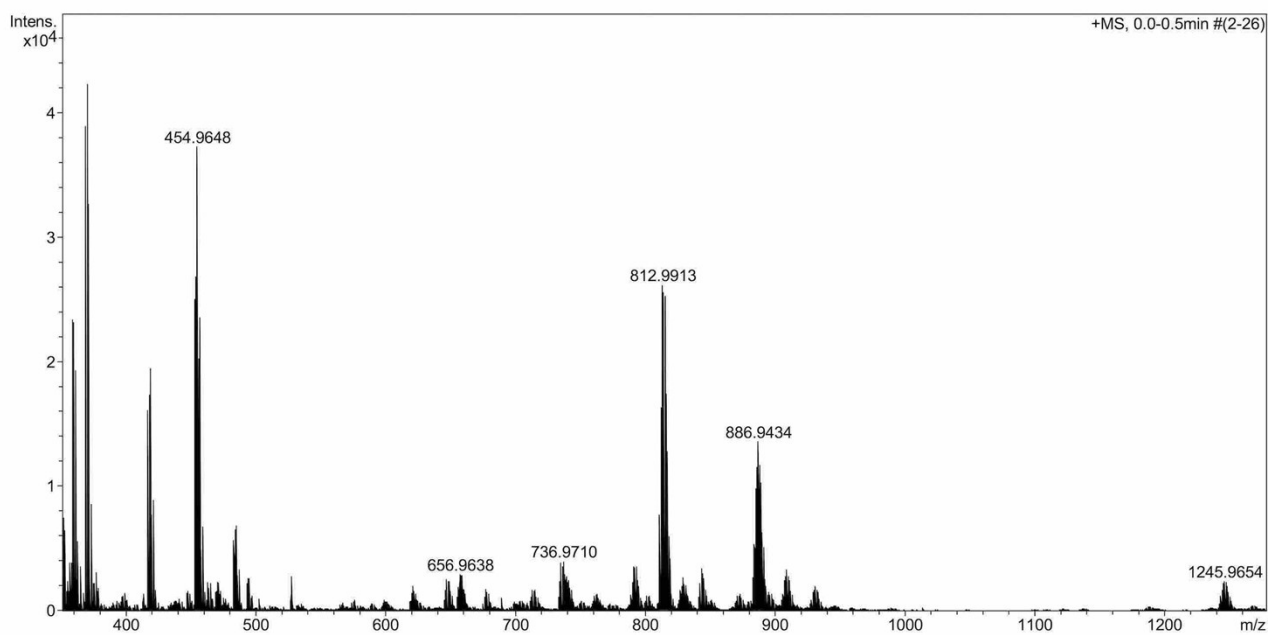

**Figure S6.** HR ESI<sup>+</sup>-MS spectrum of **3b**.

**Acquisition Parameter**

|             |            |                      |          |                  |           |
|-------------|------------|----------------------|----------|------------------|-----------|
| Source Type | ESI        | Ion Polarity         | Positive | Set Nebulizer    | 0.4 Bar   |
| Focus       | Not active |                      |          | Set Dry Heater   | 180 °C    |
| Scan Begin  | 50 m/z     | Set Capillary        | 4500 V   | Set Dry Gas      | 4.0 l/min |
| Scan End    | 3000 m/z   | Set End Plate Offset | -500 V   | Set Divert Valve | Source    |

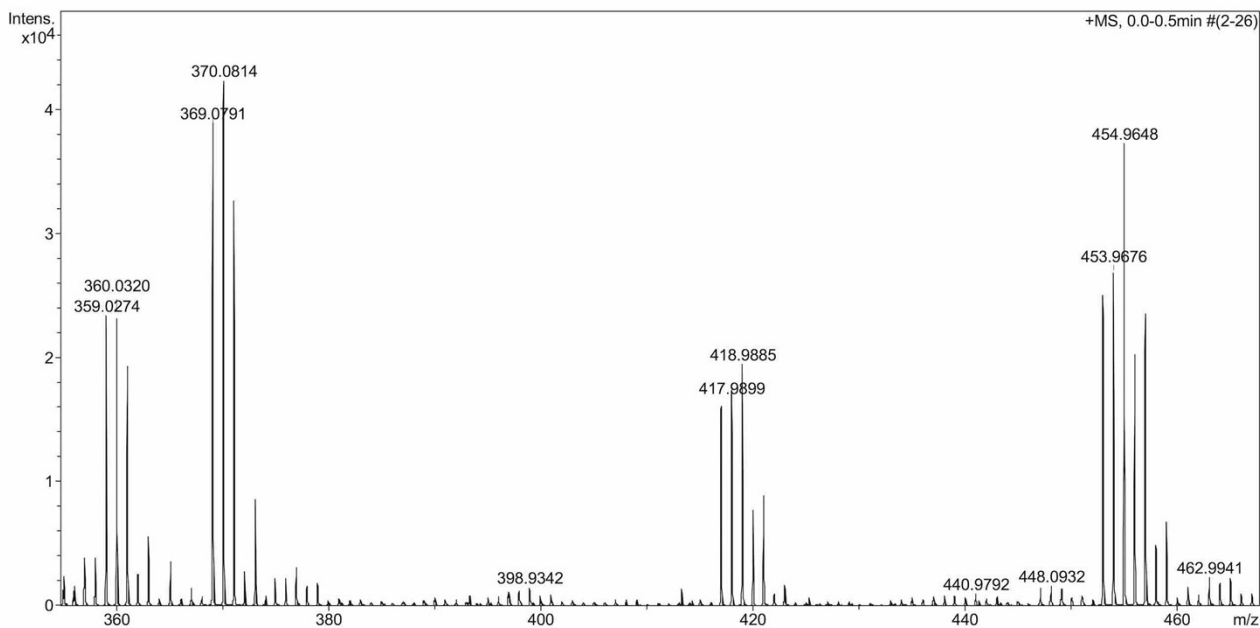

**Figure S7.** HR ESI<sup>+</sup>-MS spectrum of **3b** (low region).

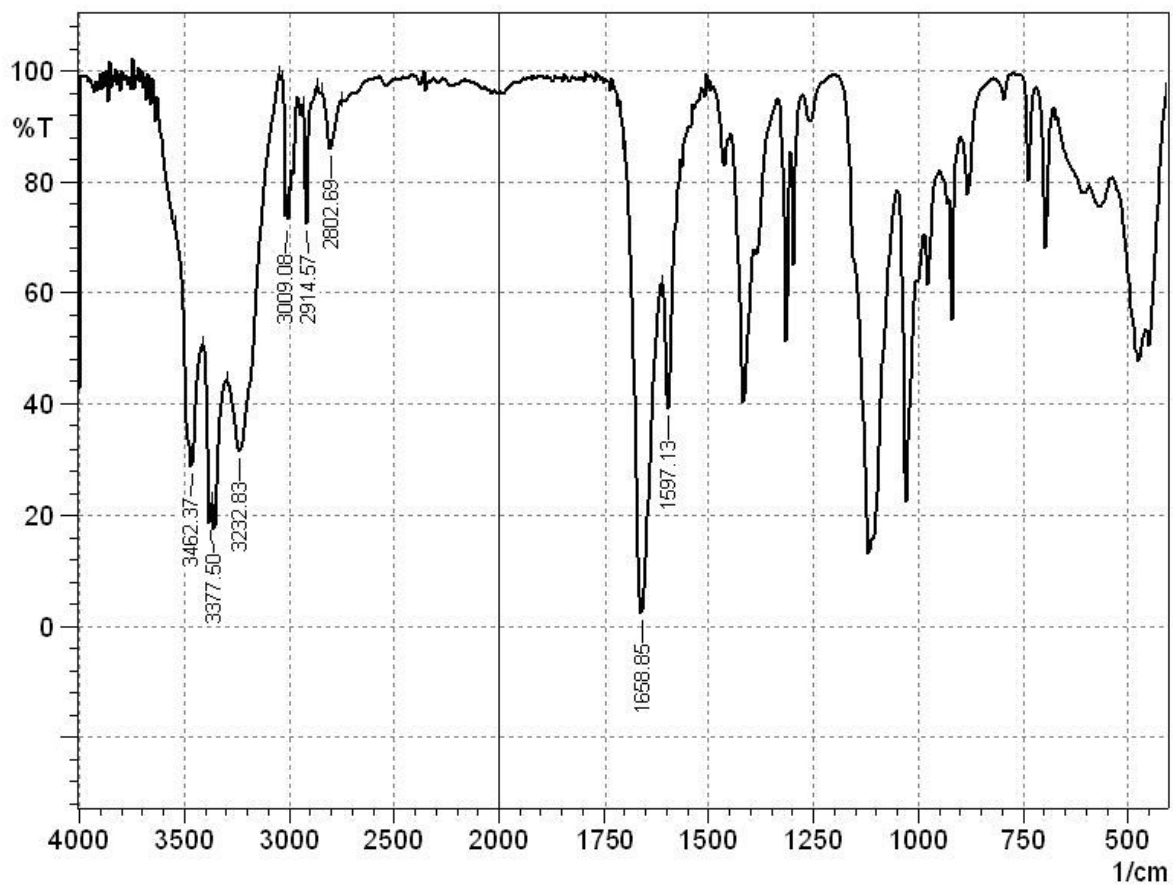

**Figure S8.** IR spectrum of **3b**.

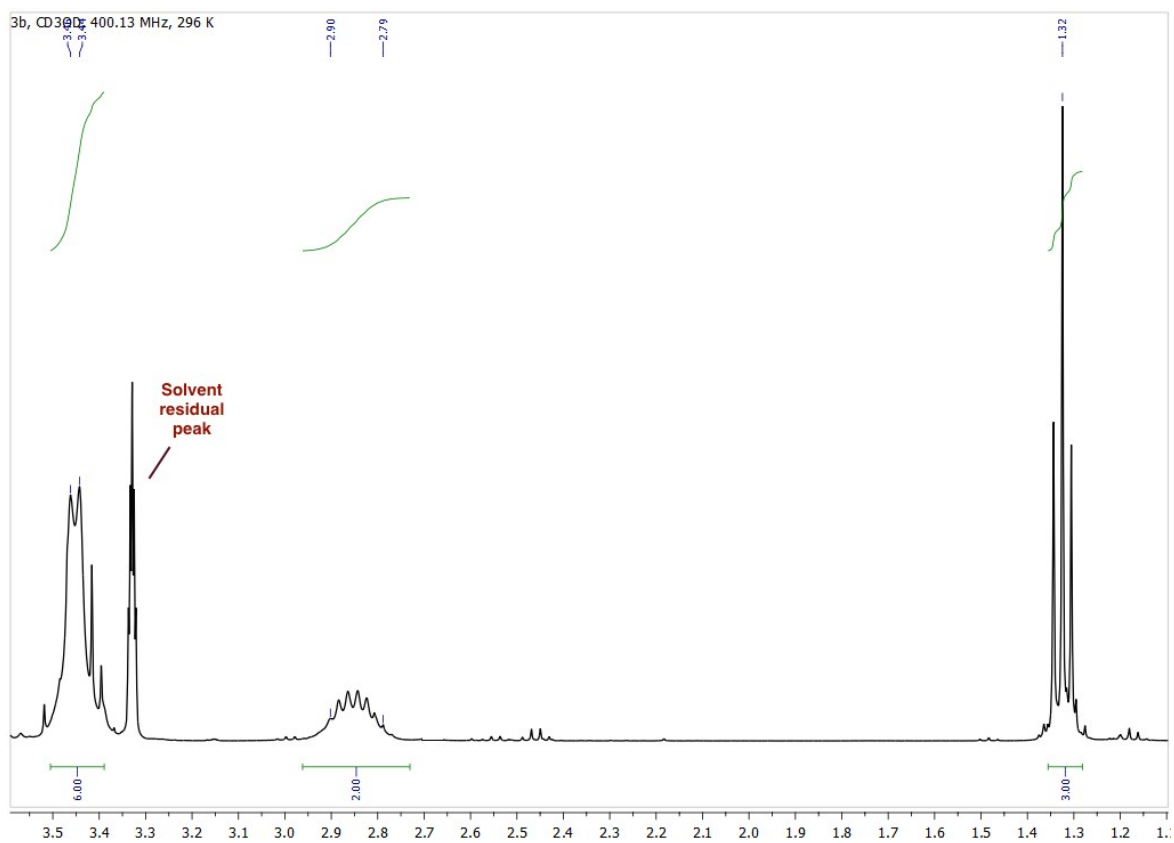

Figure S9.  $^1\text{H}$  NMR spectrum of **3b**.

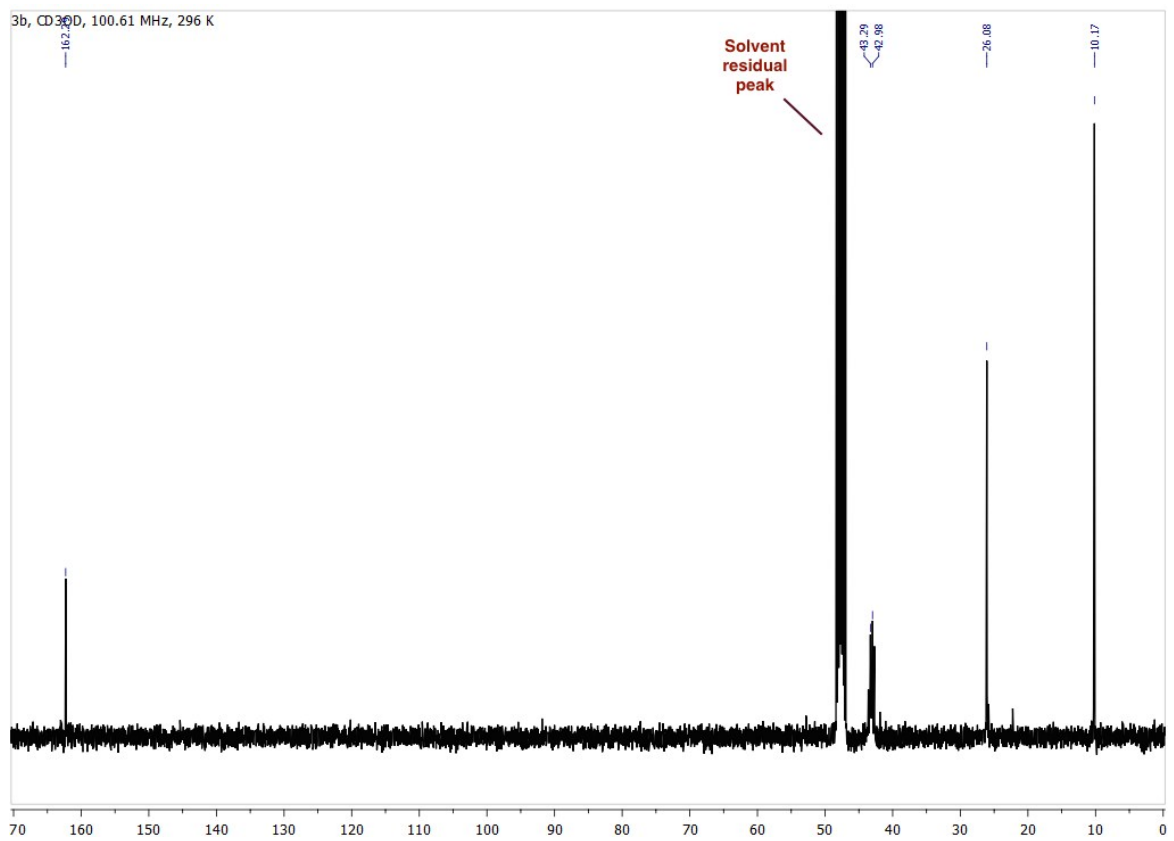

Figure S10.  $^{13}\text{C}\{^1\text{H}\}$  NMR spectrum of **3b**.

**3d**

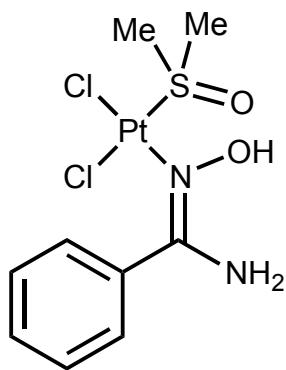

**Acquisition Parameter**

|             |            |                      |          |                  |           |
|-------------|------------|----------------------|----------|------------------|-----------|
| Source Type | ESI        | Ion Polarity         | Positive | Set Nebulizer    | 0.4 Bar   |
| Focus       | Not active |                      |          | Set Dry Heater   | 180 °C    |
| Scan Begin  | 50 m/z     | Set Capillary        | 4500 V   | Set Dry Gas      | 4.0 l/min |
| Scan End    | 3000 m/z   | Set End Plate Offset | -500 V   | Set Divert Valve | Source    |

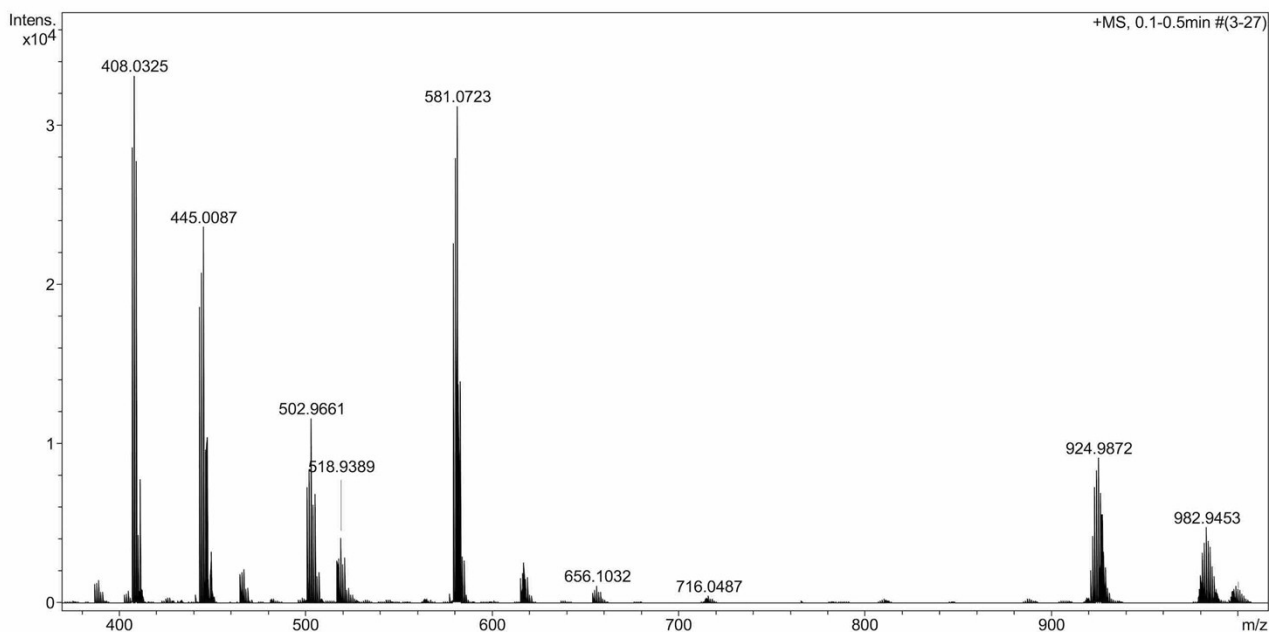

**Figure S11.** HR ESI<sup>+</sup>-MS spectrum of **3d**.

**Acquisition Parameter**

|             |            |                      |          |                  |           |
|-------------|------------|----------------------|----------|------------------|-----------|
| Source Type | ESI        | Ion Polarity         | Positive | Set Nebulizer    | 0.4 Bar   |
| Focus       | Not active |                      |          | Set Dry Heater   | 180 °C    |
| Scan Begin  | 50 m/z     | Set Capillary        | 4500 V   | Set Dry Gas      | 4.0 l/min |
| Scan End    | 3000 m/z   | Set End Plate Offset | -500 V   | Set Divert Valve | Source    |

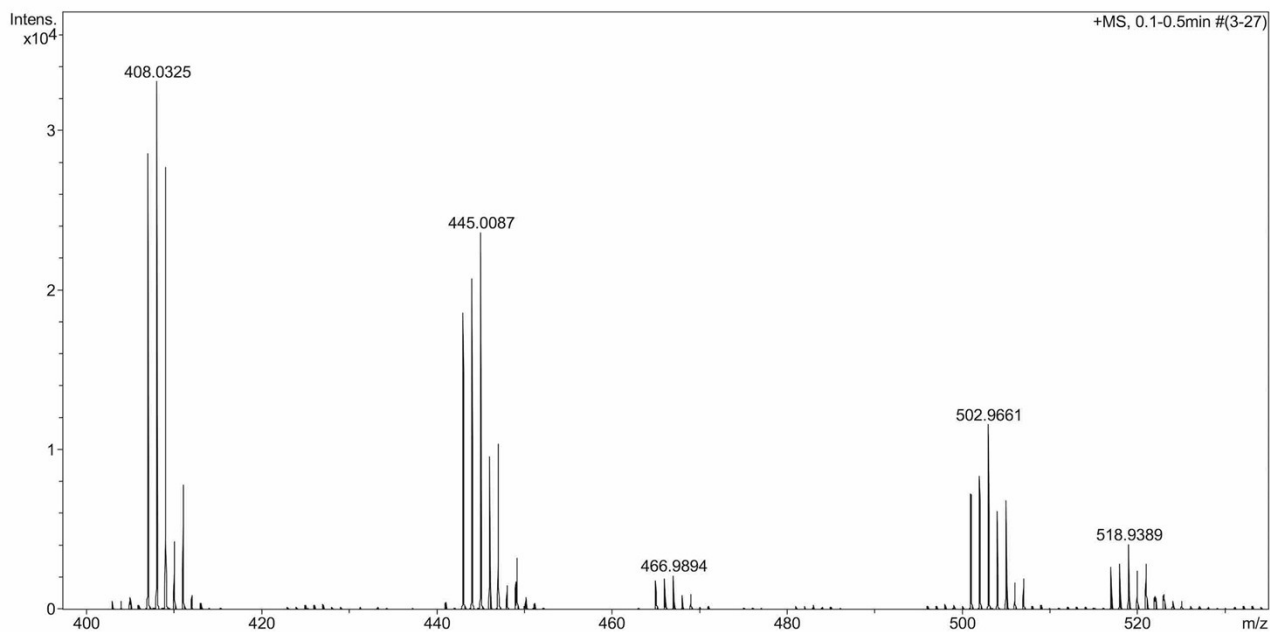

**Figure S12.** HR ESI<sup>+</sup>-MS spectrum of **3d** (low region).

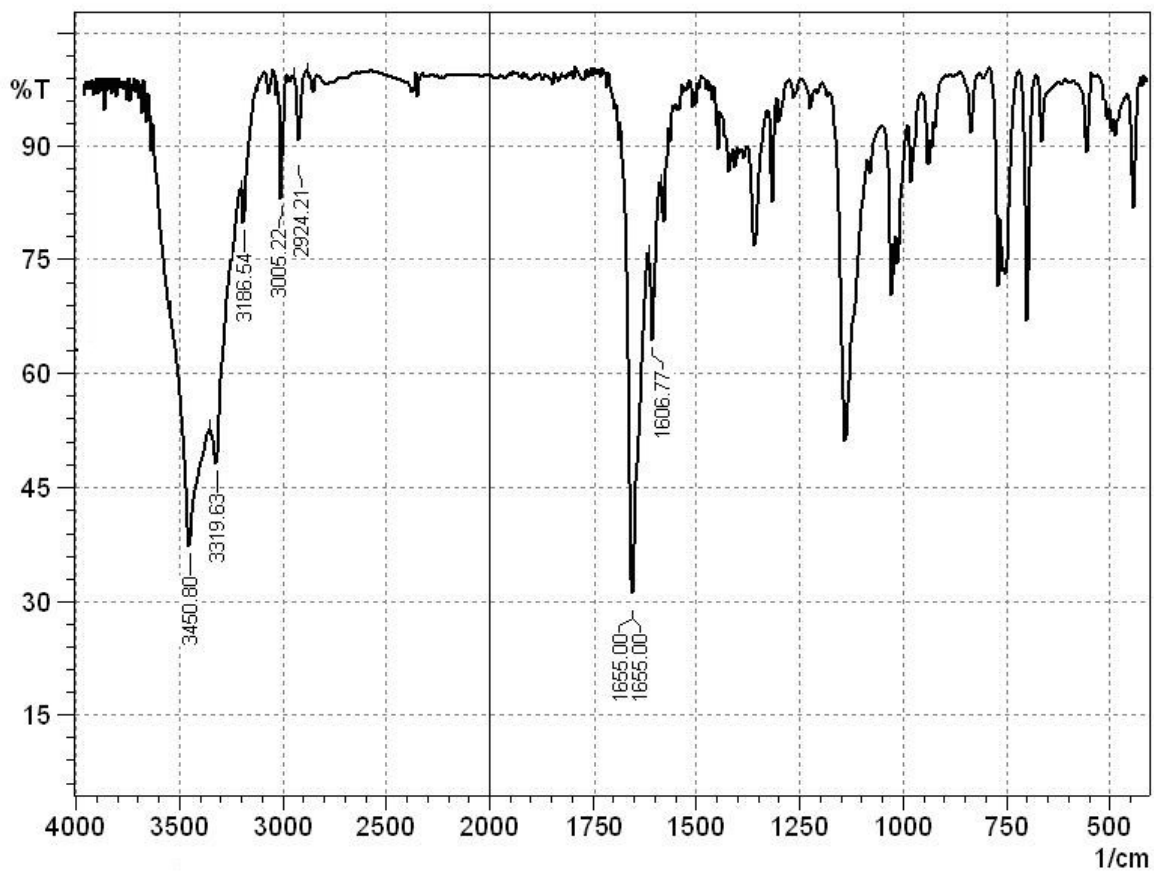

**Figure S13.** IR spectrum of **3d**.

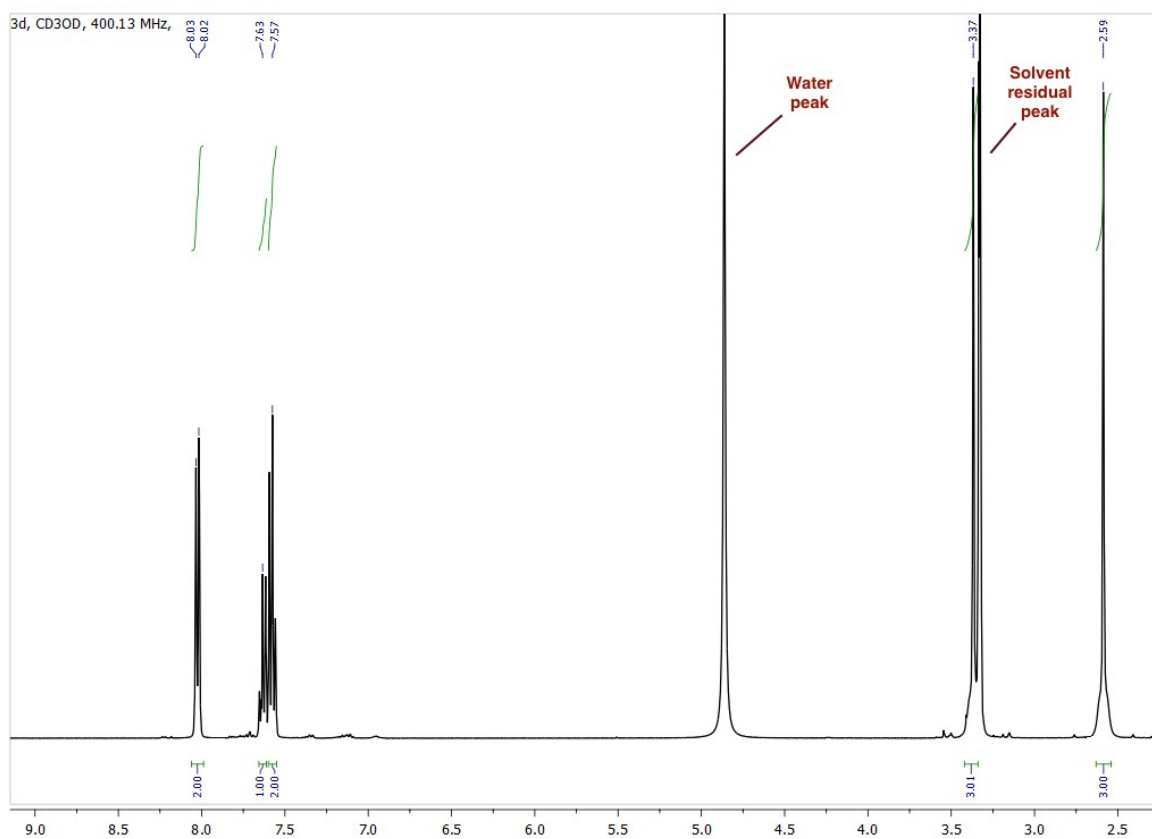

**Figure S14.**  $^1\text{H}$  NMR spectrum of **3d**.

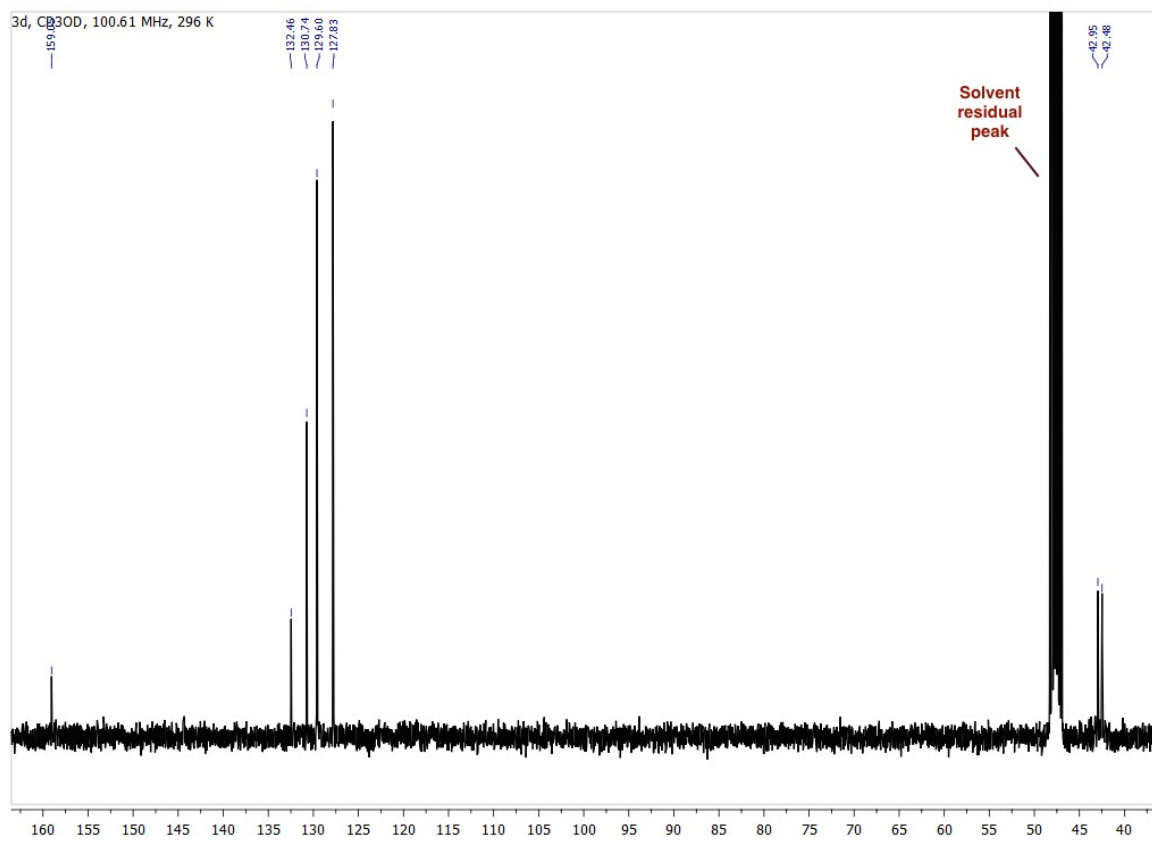

**Figure S15.**  $^{13}\text{C}\{^1\text{H}\}$  NMR spectrum of **3d**.



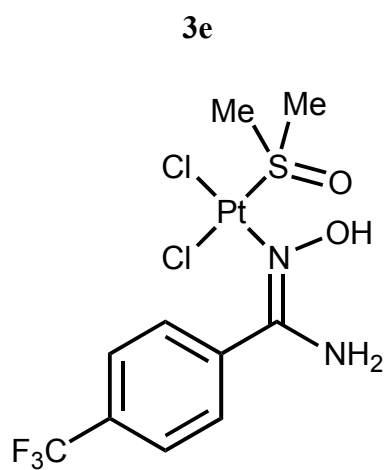

**Acquisition Parameter**

|             |            |                      |          |                  |           |
|-------------|------------|----------------------|----------|------------------|-----------|
| Source Type | ESI        | Ion Polarity         | Positive | Set Nebulizer    | 0.4 Bar   |
| Focus       | Not active | Set Capillary        | 4500 V   | Set Dry Heater   | 180 °C    |
| Scan Begin  | 50 m/z     | Set End Plate Offset | -500 V   | Set Dry Gas      | 4.0 l/min |
| Scan End    | 3000 m/z   |                      |          | Set Divert Valve | Source    |

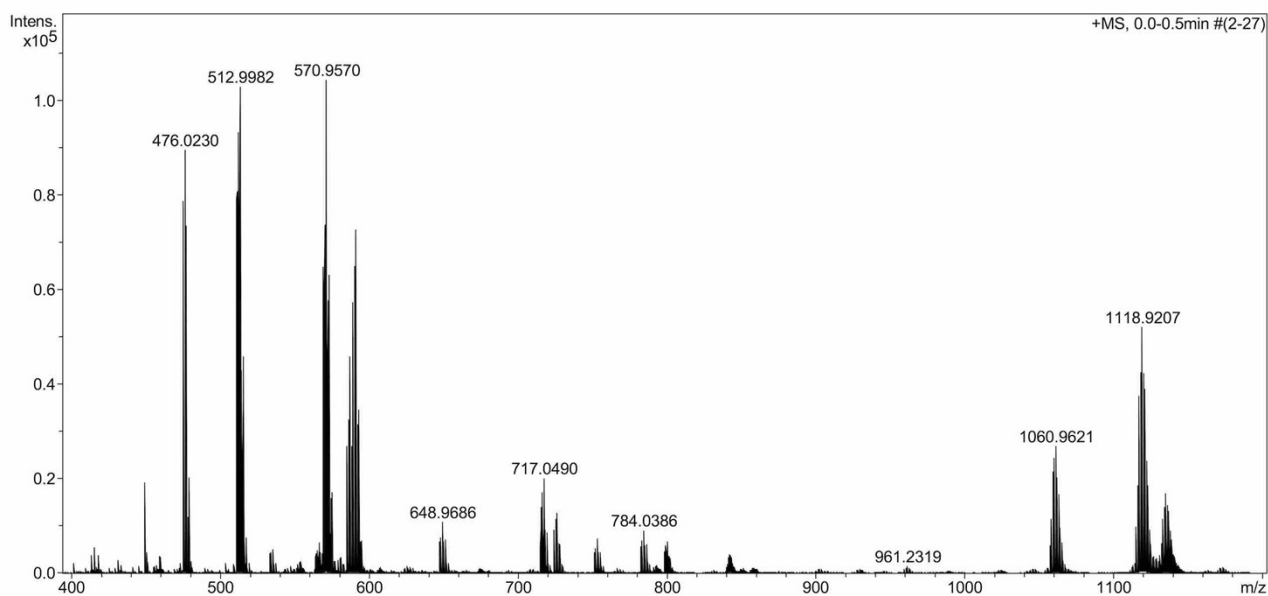

**Figure S16.** HR ESI<sup>+</sup>-MS spectrum of **3e**.

**Acquisition Parameter**

|             |            |                      |          |                  |           |
|-------------|------------|----------------------|----------|------------------|-----------|
| Source Type | ESI        | Ion Polarity         | Positive | Set Nebulizer    | 0.4 Bar   |
| Focus       | Not active |                      |          | Set Dry Heater   | 180 °C    |
| Scan Begin  | 50 m/z     | Set Capillary        | 4500 V   | Set Dry Gas      | 4.0 l/min |
| Scan End    | 3000 m/z   | Set End Plate Offset | -500 V   | Set Divert Valve | Source    |

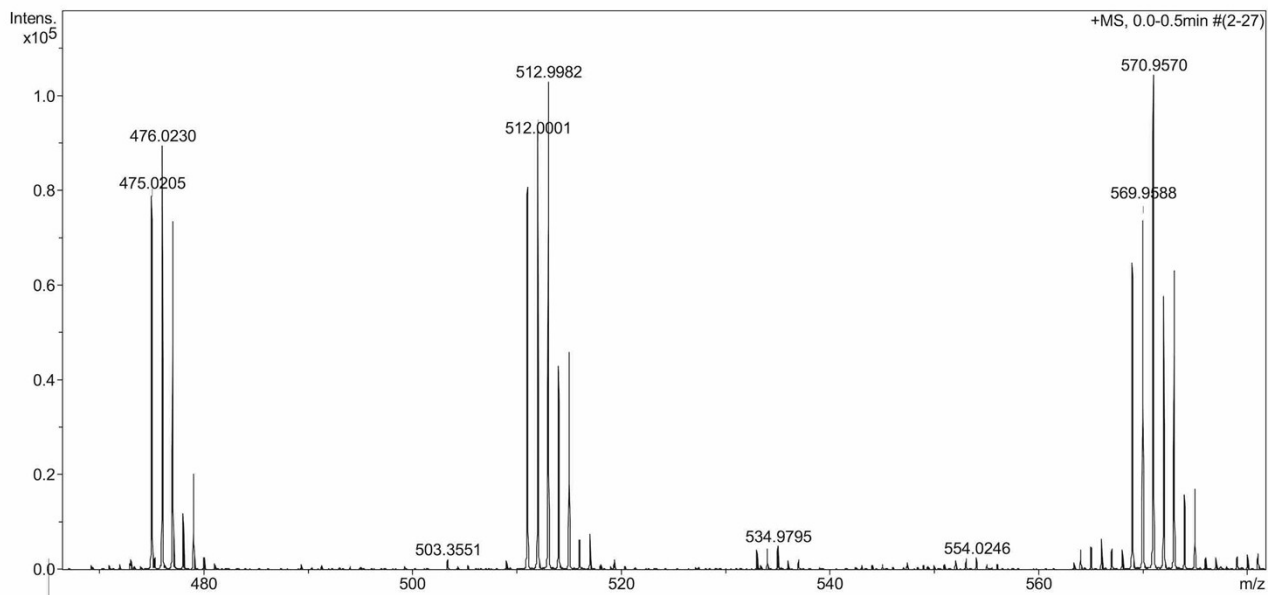

**Figure S17.** HR ESI<sup>+</sup>-MS spectrum of **3e** (low region).

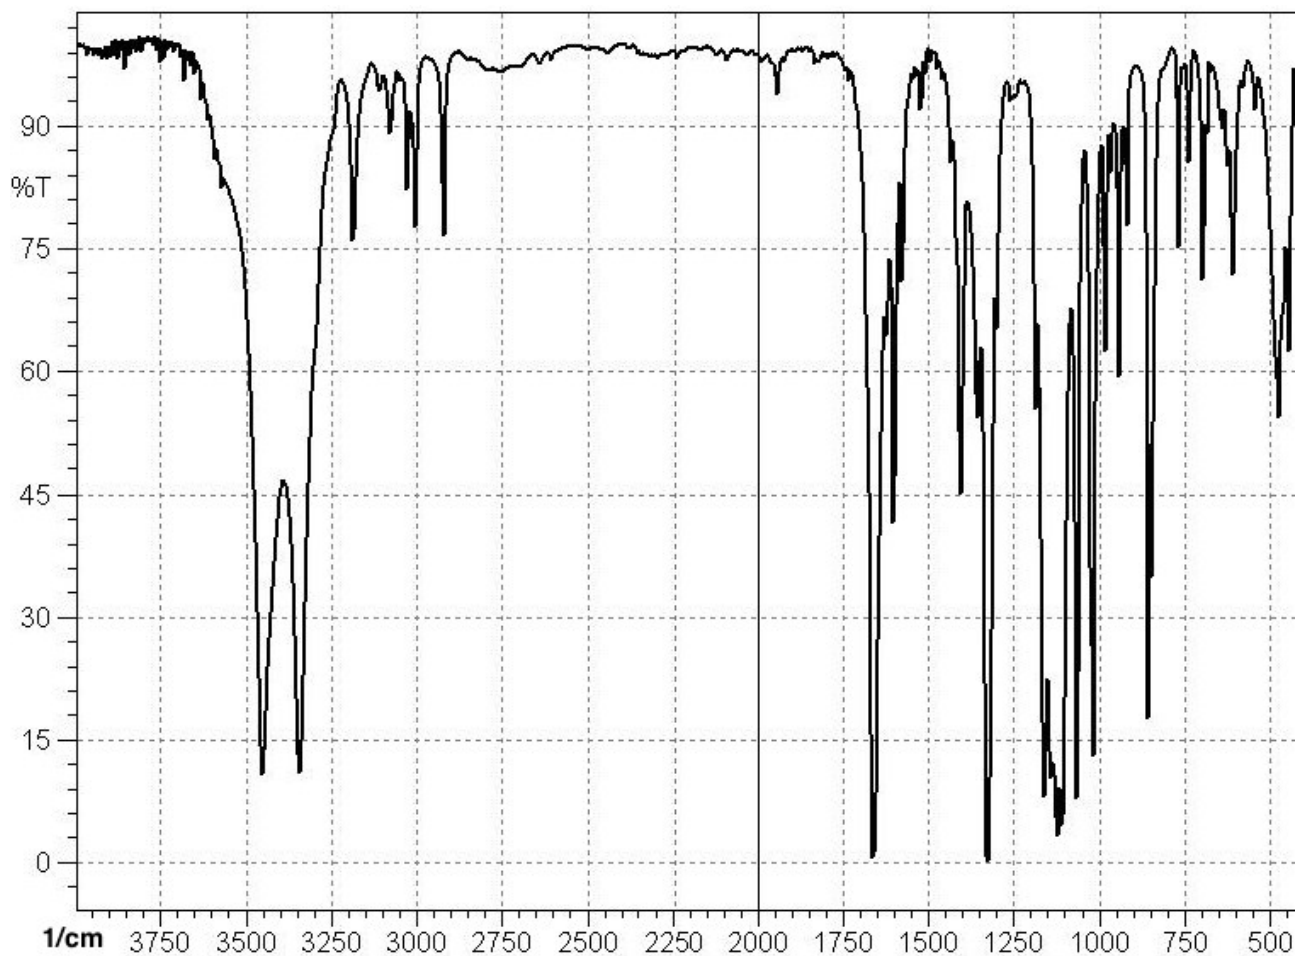

Figure S18. IR spectrum of **3e**.

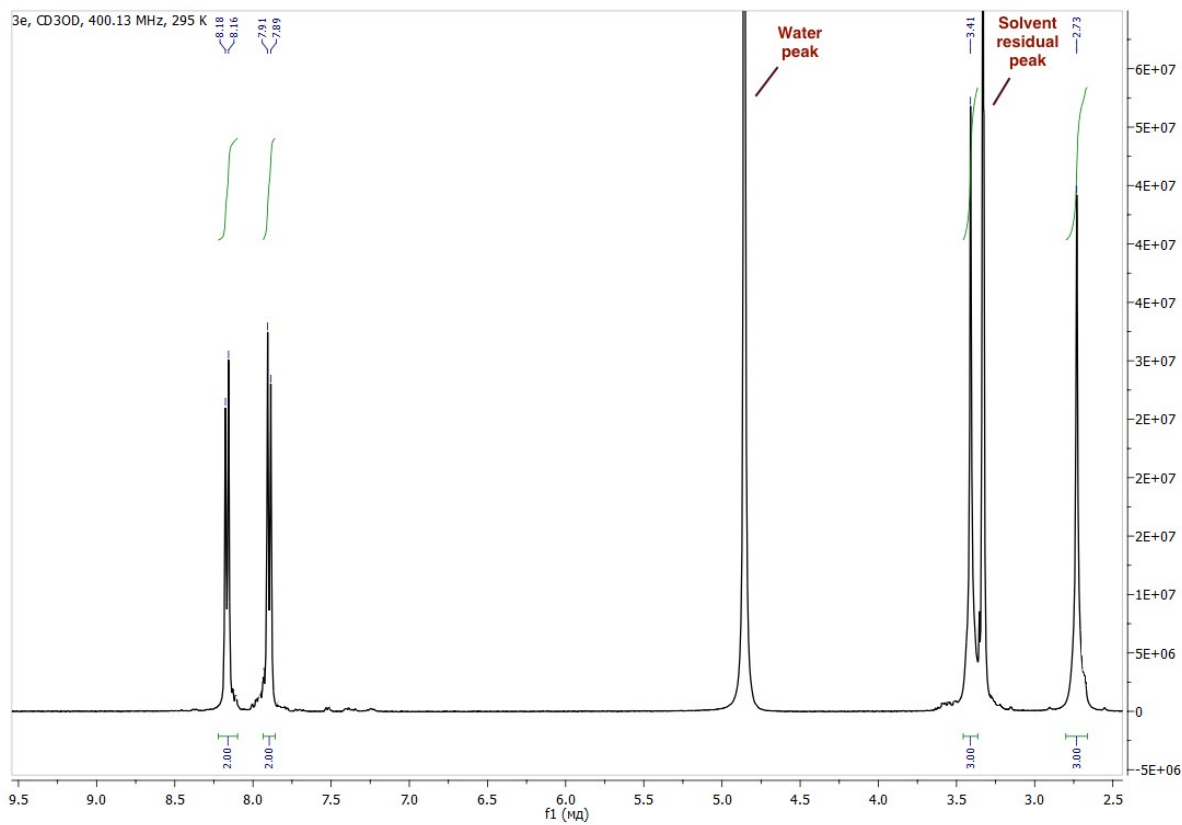

Figure S19.  $^1\text{H}$  NMR spectrum of **3e**.

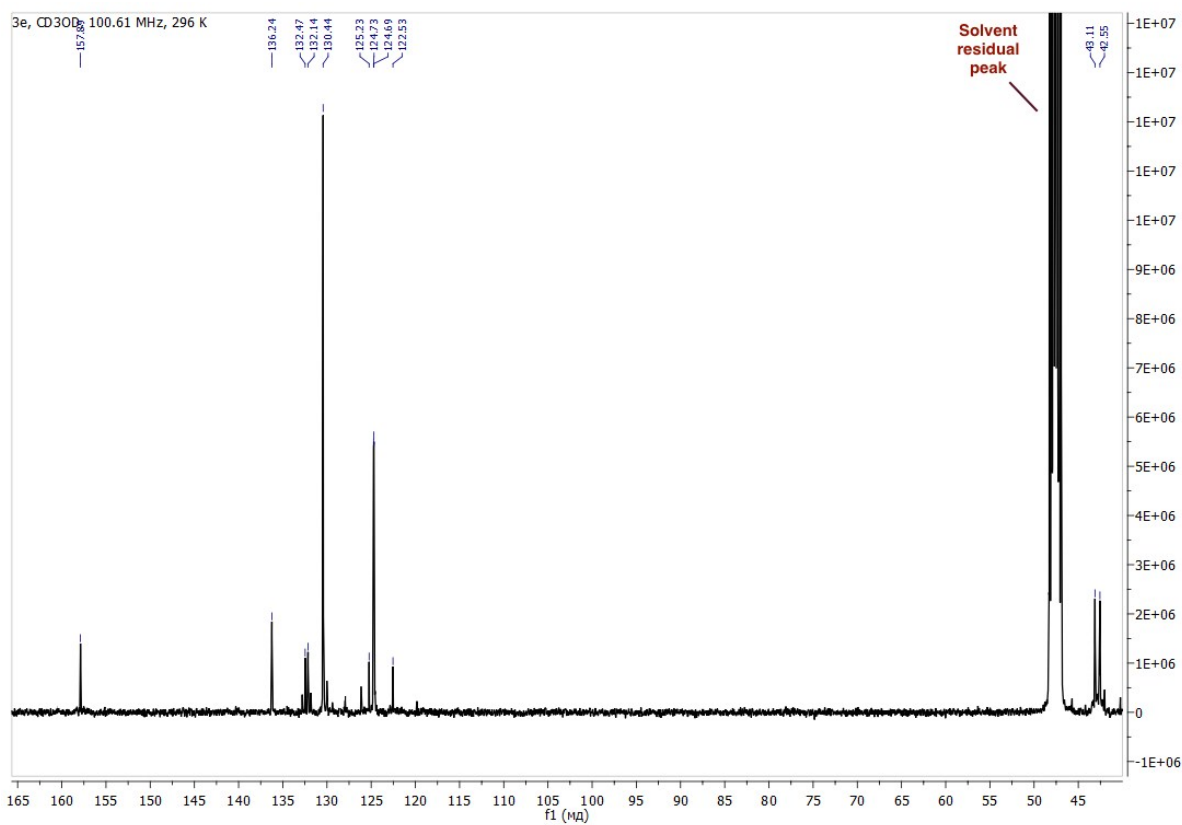

**Figure S20.**  $^{13}\text{C}\{^1\text{H}\}$  NMR spectrum of **3e**.

**3f**

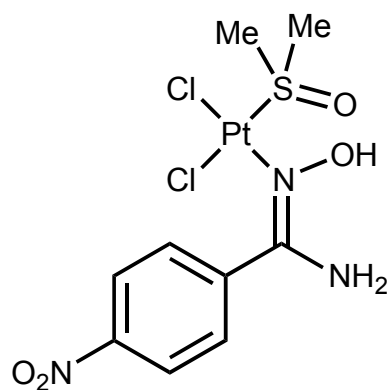

**Acquisition Parameter**

|             |            |                      |          |                  |           |
|-------------|------------|----------------------|----------|------------------|-----------|
| Source Type | ESI        | Ion Polarity         | Positive | Set Nebulizer    | 0.8 Bar   |
| Focus       | Not active | Set Capillary        | 4500 V   | Set Dry Heater   | 180 °C    |
| Scan Begin  | 50 m/z     | Set End Plate Offset | -500 V   | Set Dry Gas      | 8.0 l/min |
| Scan End    | 3000 m/z   |                      |          | Set Divert Valve | Source    |

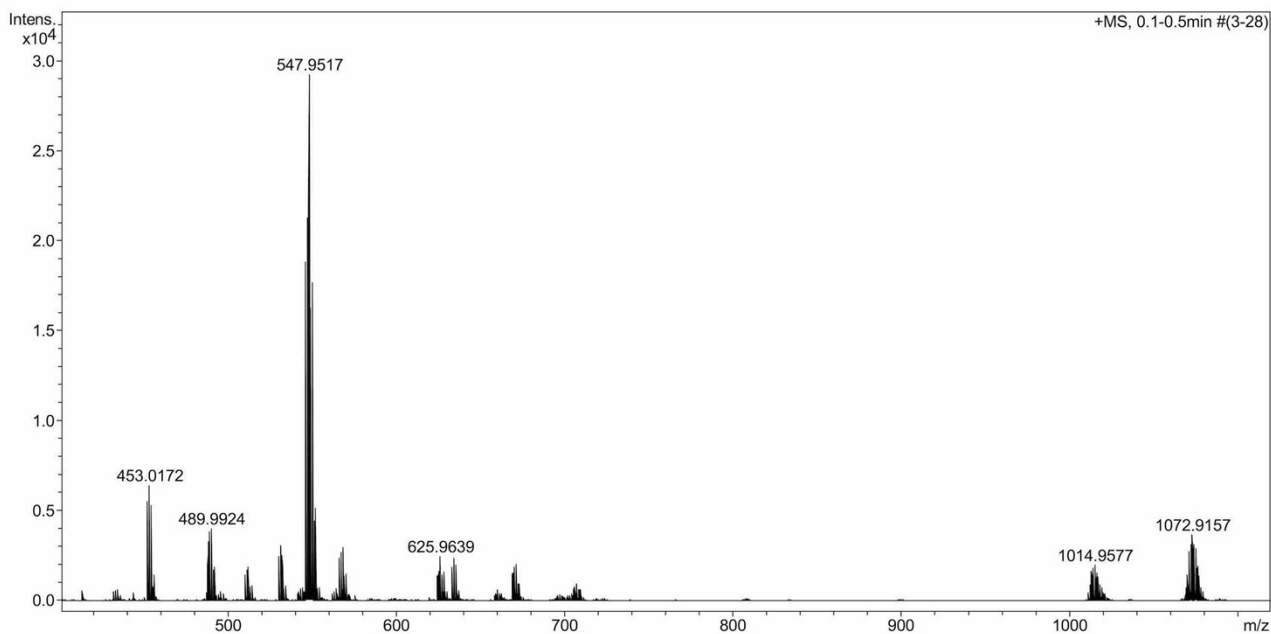

**Figure S21.** HR ESI<sup>+</sup>-MS spectrum of **3f**.

**Acquisition Parameter**

|             |            |                      |          |                  |           |
|-------------|------------|----------------------|----------|------------------|-----------|
| Source Type | ESI        | Ion Polarity         | Positive | Set Nebulizer    | 0.8 Bar   |
| Focus       | Not active |                      |          | Set Dry Heater   | 180 °C    |
| Scan Begin  | 50 m/z     | Set Capillary        | 4500 V   | Set Dry Gas      | 8.0 l/min |
| Scan End    | 3000 m/z   | Set End Plate Offset | -500 V   | Set Divert Valve | Source    |

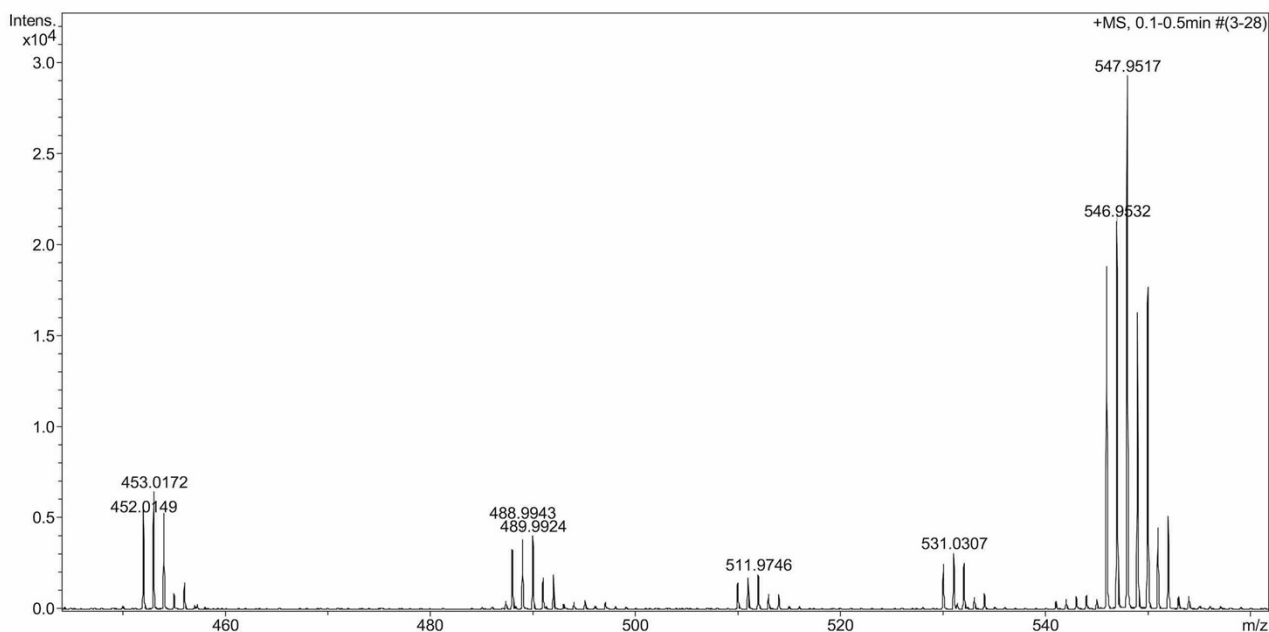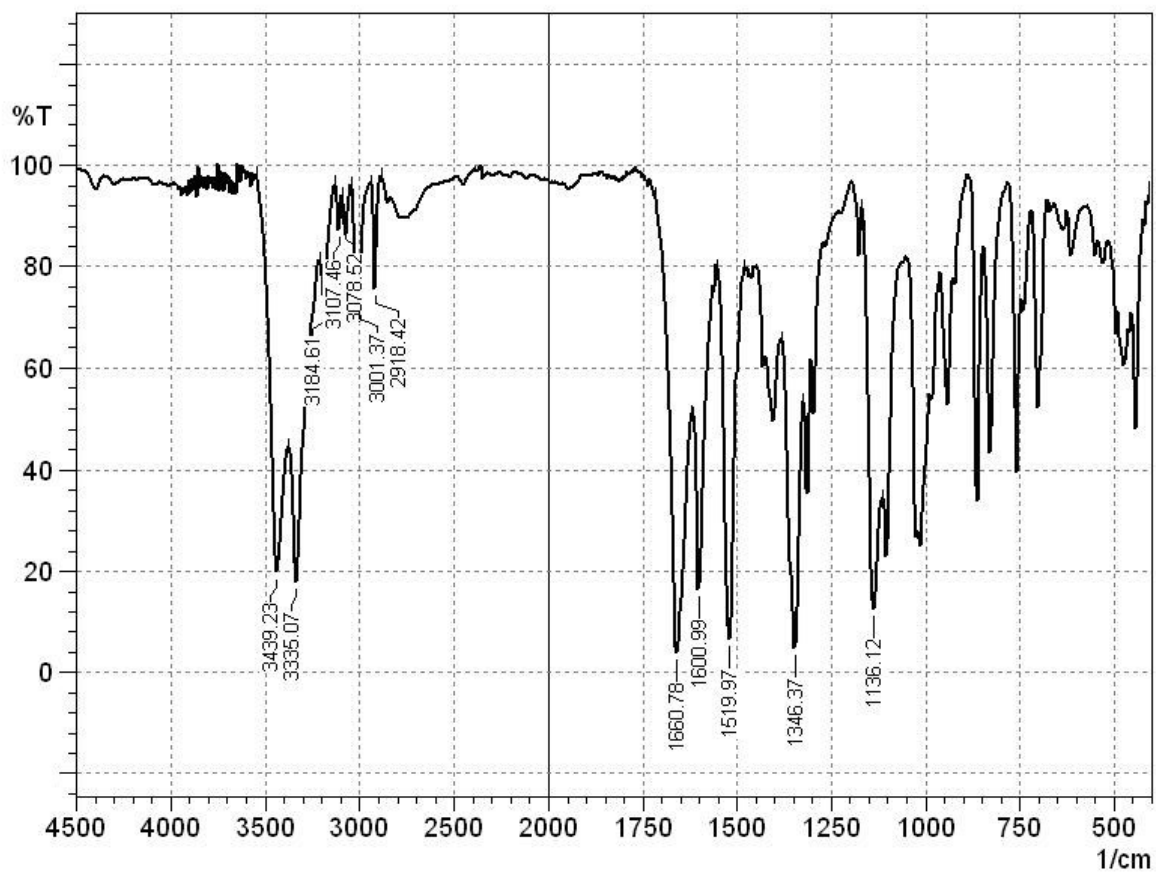

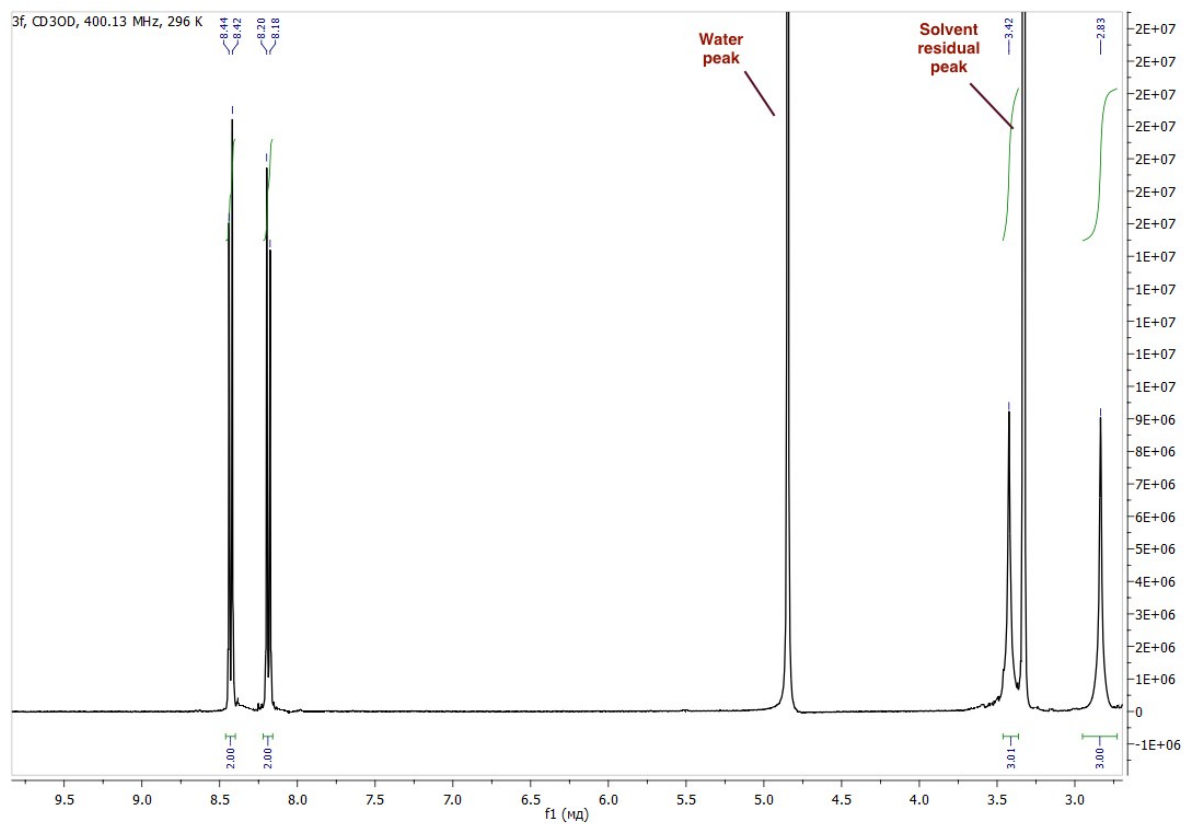

Figure S24.  $^1\text{H}$  NMR spectrum of **3f**.

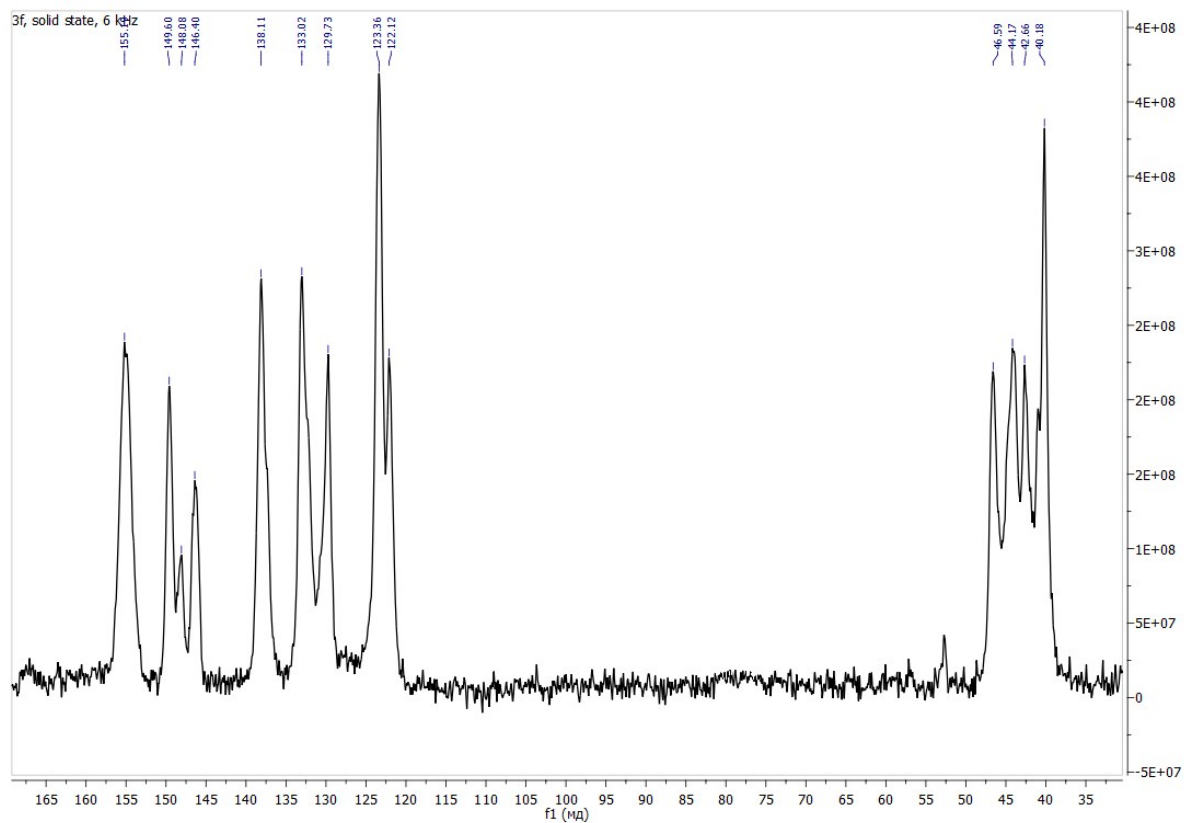

Figure S25. CP-MAS TOSS  $^{13}\text{C}\{^1\text{H}\}$  NMR spectrum of **3f**.

## Spectra of 4a-g

### 4a

#### Acquisition Parameter

|             |            |                      |          |                  |           |
|-------------|------------|----------------------|----------|------------------|-----------|
| Source Type | ESI        | Ion Polarity         | Positive | Set Nebulizer    | 0.4 Bar   |
| Focus       | Not active |                      |          | Set Dry Heater   | 180 °C    |
| Scan Begin  | 50 m/z     | Set Capillary        | 4500 V   | Set Dry Gas      | 4.0 l/min |
| Scan End    | 3000 m/z   | Set End Plate Offset | -500 V   | Set Divert Valve | Source    |

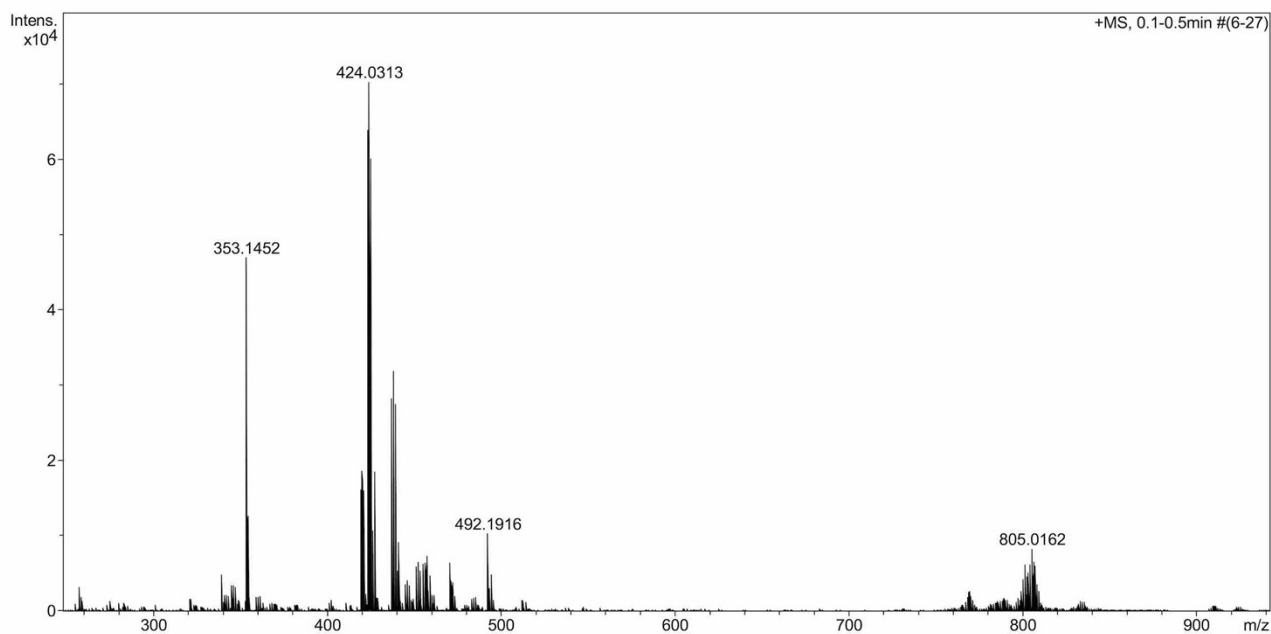

Figure S26. HR ESI+-MS spectrum of 4a reaction mixture.

#### Acquisition Parameter

|             |            |                      |          |                  |           |
|-------------|------------|----------------------|----------|------------------|-----------|
| Source Type | ESI        | Ion Polarity         | Positive | Set Nebulizer    | 0.4 Bar   |
| Focus       | Not active |                      |          | Set Dry Heater   | 180 °C    |
| Scan Begin  | 50 m/z     | Set Capillary        | 4500 V   | Set Dry Gas      | 4.0 l/min |
| Scan End    | 3000 m/z   | Set End Plate Offset | -500 V   | Set Divert Valve | Source    |

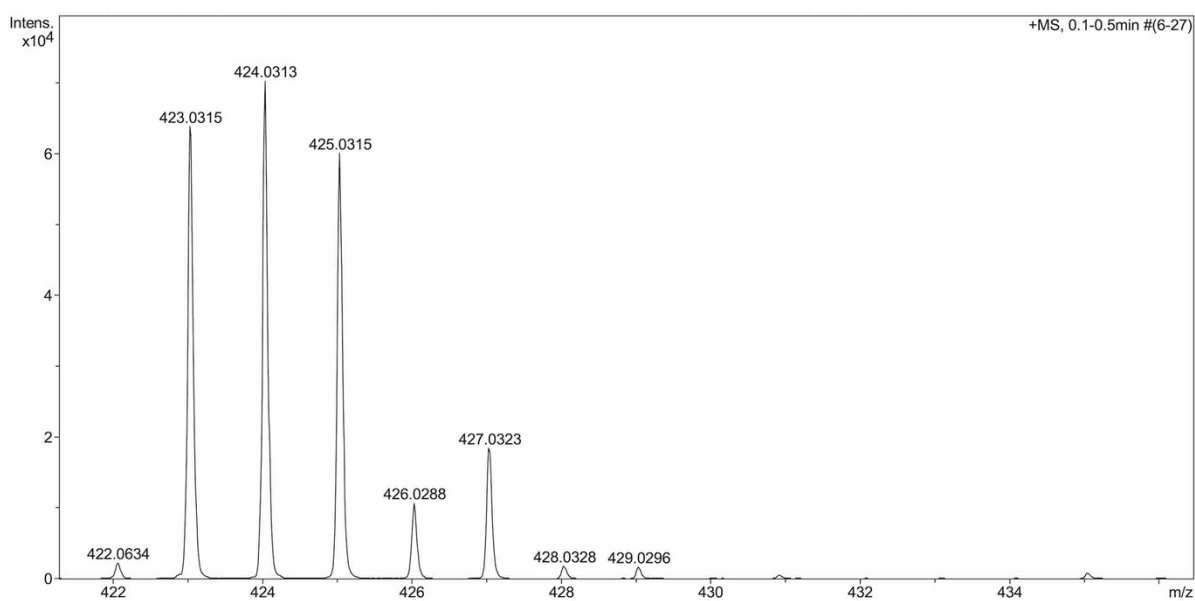

Figure S27. HR ESI+-MS spectrum of 4a reaction mixture.



## 4b

### Acquisition Parameter

|             |            |                      |          |                  |           |
|-------------|------------|----------------------|----------|------------------|-----------|
| Source Type | ESI        | Ion Polarity         | Positive | Set Nebulizer    | 0.4 Bar   |
| Focus       | Not active |                      |          | Set Dry Heater   | 180 °C    |
| Scan Begin  | 50 m/z     | Set Capillary        | 4500 V   | Set Dry Gas      | 4.0 l/min |
| Scan End    | 3000 m/z   | Set End Plate Offset | -500 V   | Set Divert Valve | Source    |

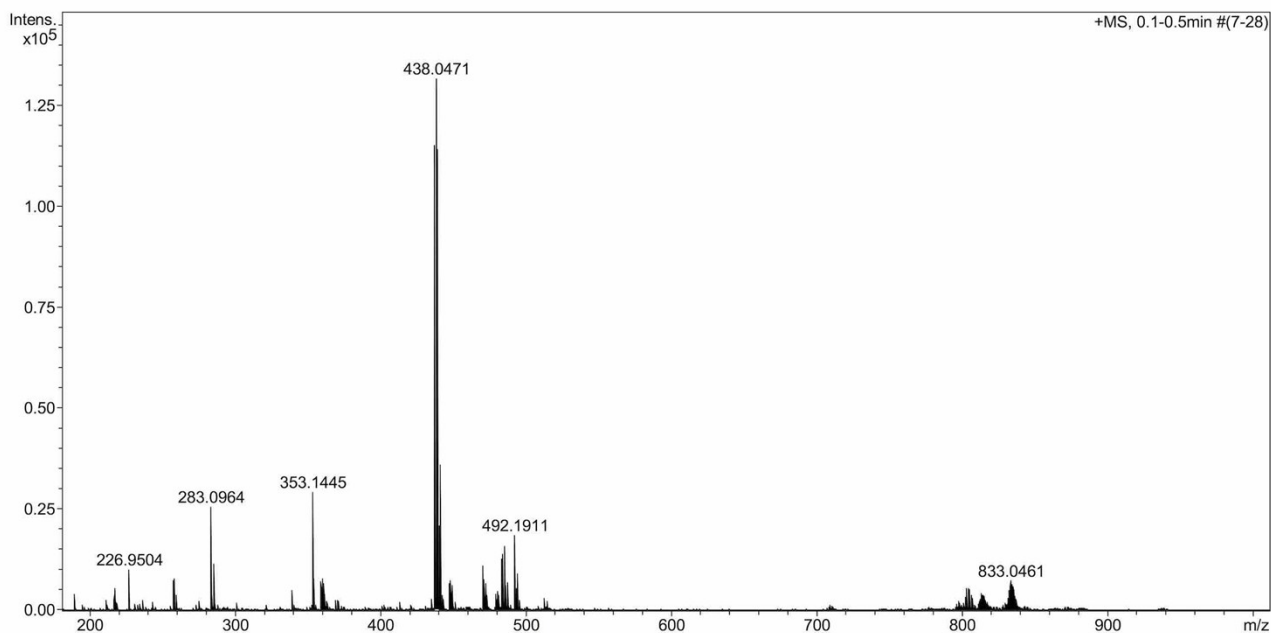

Figure S28. HR ESI<sup>+</sup>-MS spectrum of **4b** reaction mixture.

### Acquisition Parameter

|             |            |                      |          |                  |           |
|-------------|------------|----------------------|----------|------------------|-----------|
| Source Type | ESI        | Ion Polarity         | Positive | Set Nebulizer    | 0.4 Bar   |
| Focus       | Not active |                      |          | Set Dry Heater   | 180 °C    |
| Scan Begin  | 50 m/z     | Set Capillary        | 4500 V   | Set Dry Gas      | 4.0 l/min |
| Scan End    | 3000 m/z   | Set End Plate Offset | -500 V   | Set Divert Valve | Source    |

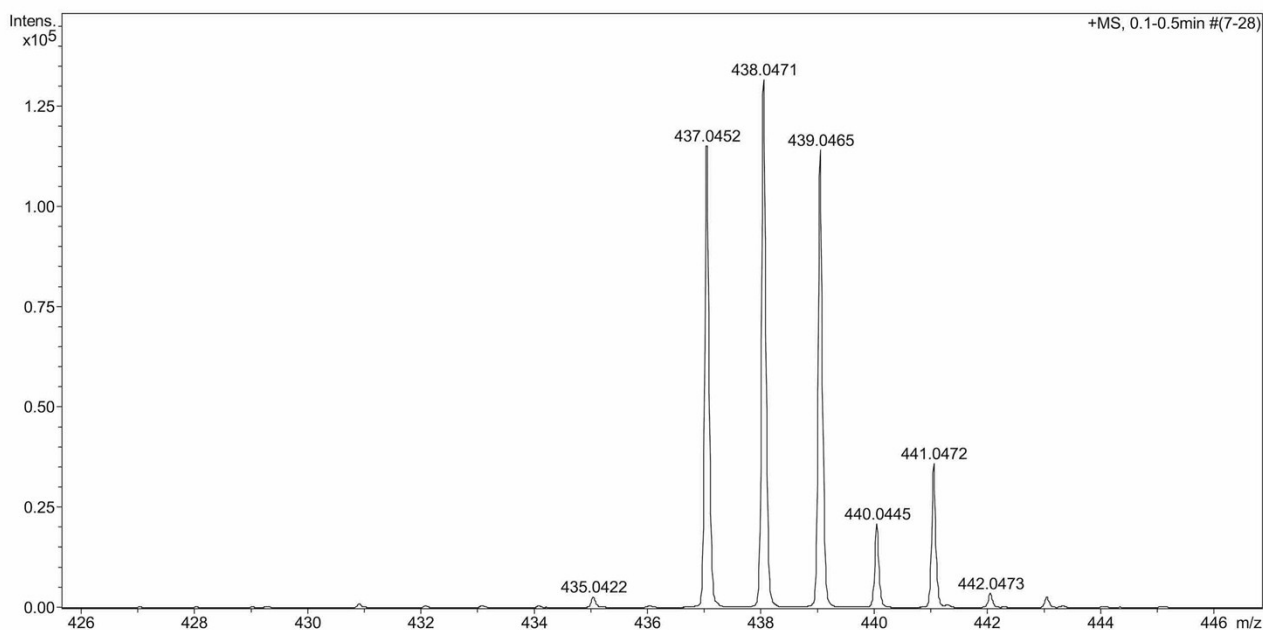

Figure S29. HR ESI<sup>+</sup>-MS spectrum of **4b** reaction mixture.

4c

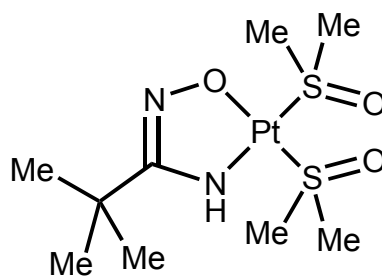

Acquisition Parameter

|             |            |                      |          |                  |           |
|-------------|------------|----------------------|----------|------------------|-----------|
| Source Type | ESI        | Ion Polarity         | Positive | Set Nebulizer    | 0.4 Bar   |
| Focus       | Not active | Set Capillary        | 4500 V   | Set Dry Heater   | 180 °C    |
| Scan Begin  | 50 m/z     | Set End Plate Offset | -500 V   | Set Dry Gas      | 4.0 l/min |
| Scan End    | 3000 m/z   |                      |          | Set Divert Valve | Source    |

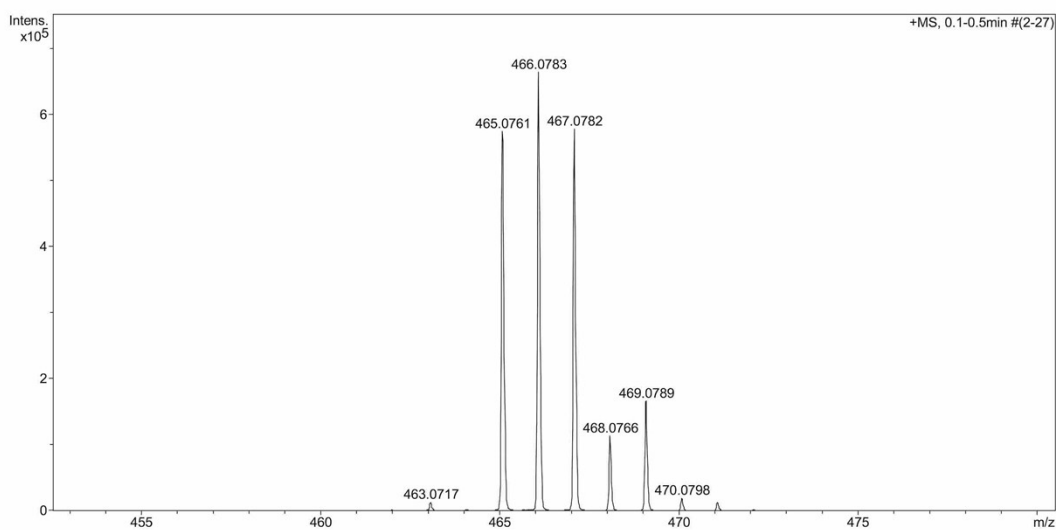

Figure S30. HR ESI<sup>+</sup>-MS spectrum of 4c.

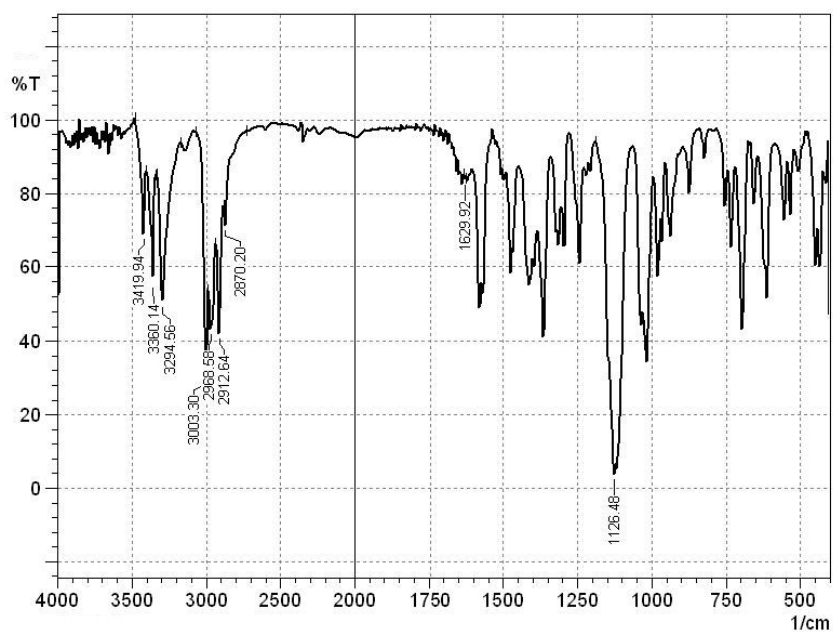

Figure S31. IR spectrum of 4c.

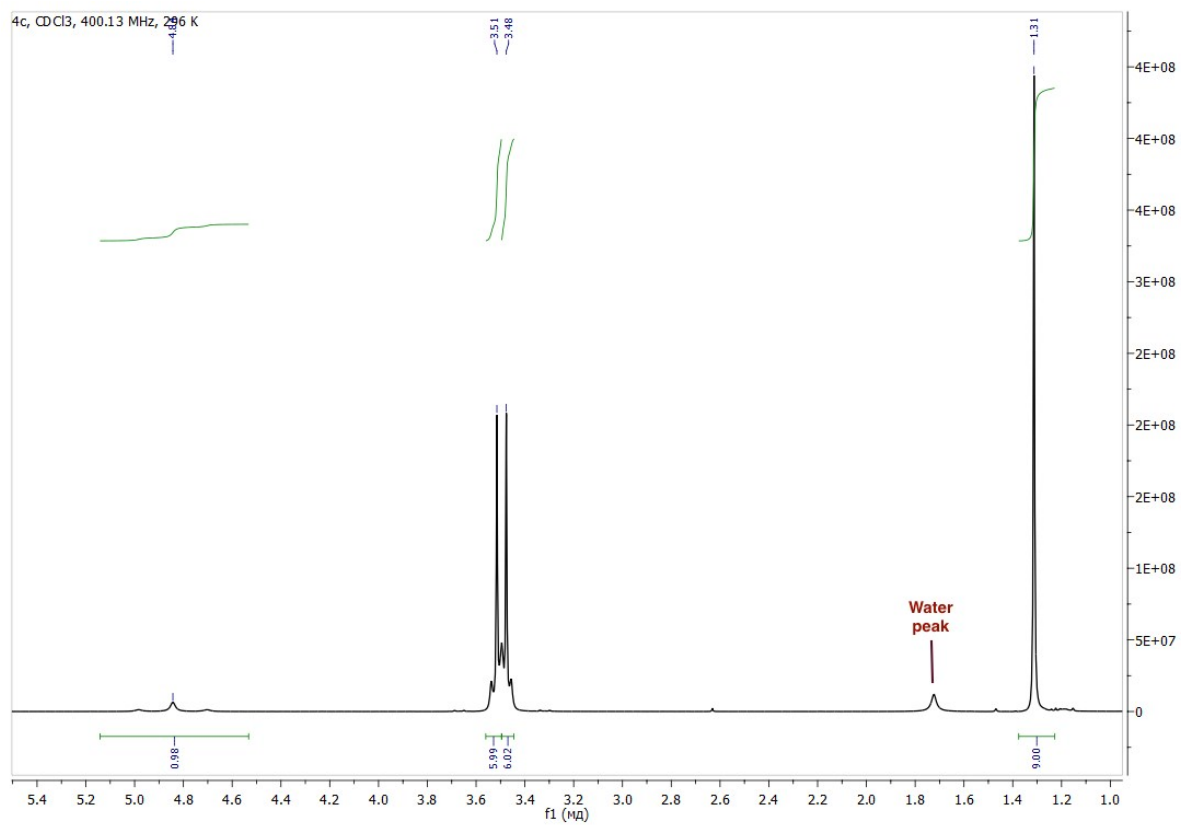

Figure S32. <sup>1</sup>H NMR spectrum of **4c**.

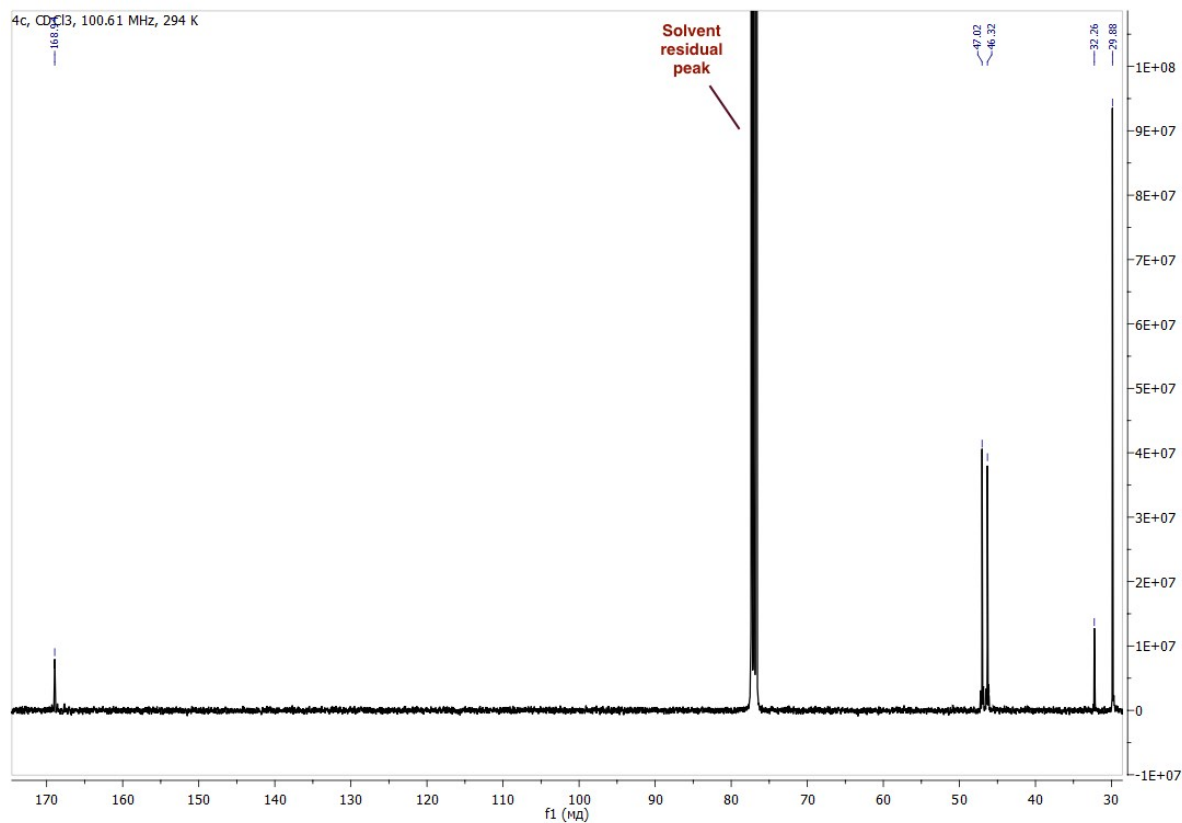

Figure S33. <sup>13</sup>C{<sup>1</sup>H} NMR spectrum of **4c**.

**4d**

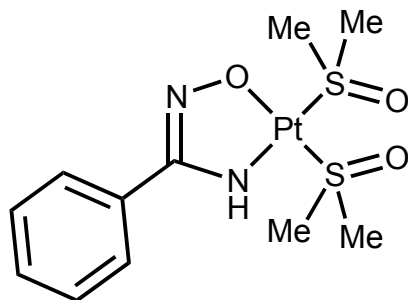

**Acquisition Parameter**

|             |            |                      |          |                  |           |
|-------------|------------|----------------------|----------|------------------|-----------|
| Source Type | ESI        | Ion Polarity         | Positive | Set Nebulizer    | 0.4 Bar   |
| Focus       | Not active | Set Capillary        | 4500 V   | Set Dry Heater   | 180 °C    |
| Scan Begin  | 50 m/z     | Set End Plate Offset | -500 V   | Set Dry Gas      | 4.0 l/min |
| Scan End    | 3000 m/z   |                      |          | Set Divert Valve | Source    |

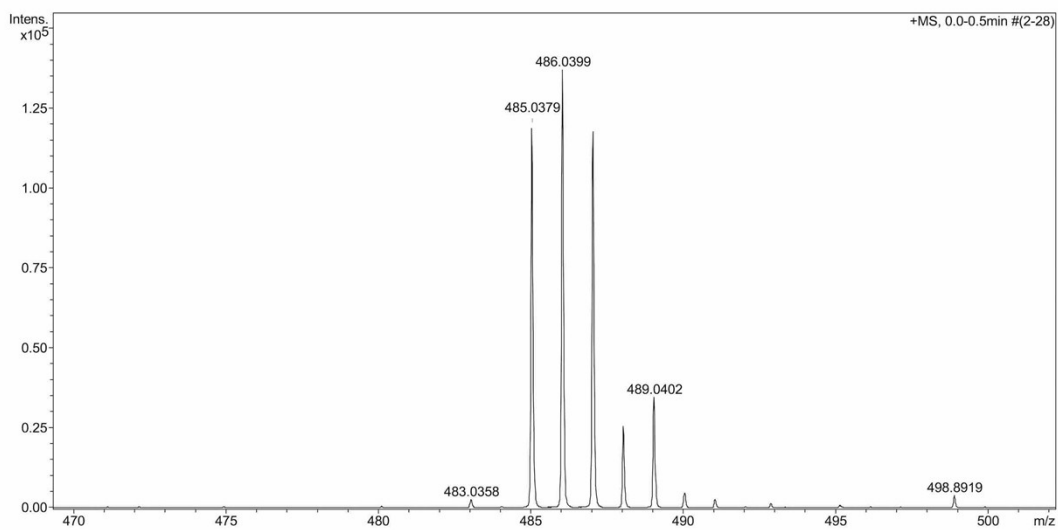

**Figure S34.** HR ESI<sup>+</sup>-MS spectrum of **4d**.

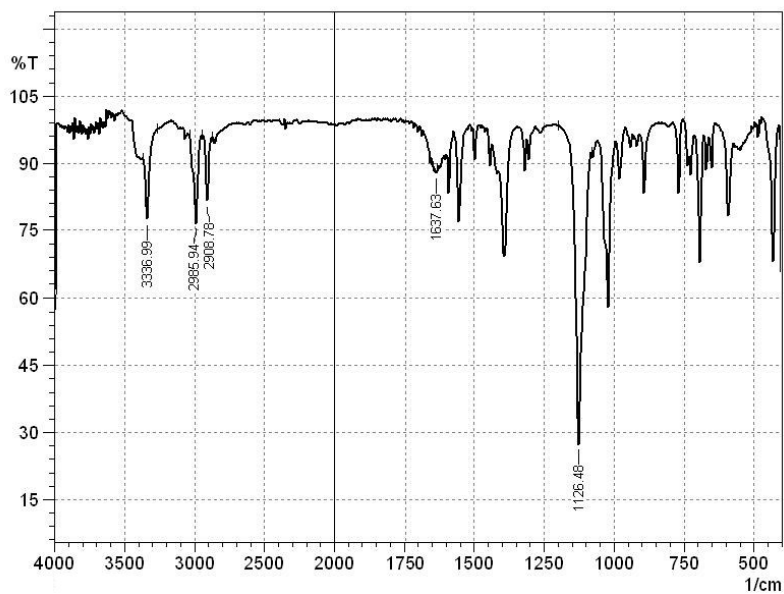

**Figure S35.** IR spectrum of **4d**.

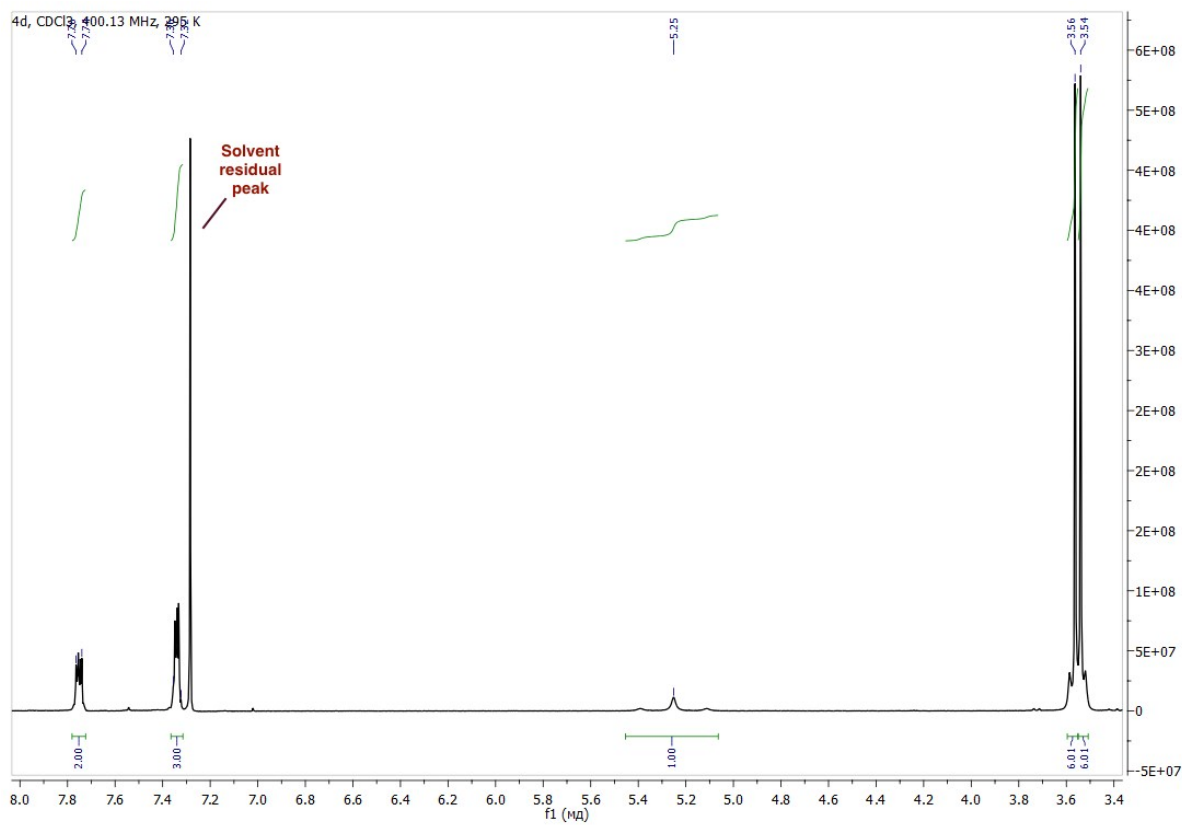

Figure S36.  $^1\text{H}$  NMR spectrum of **4d**.

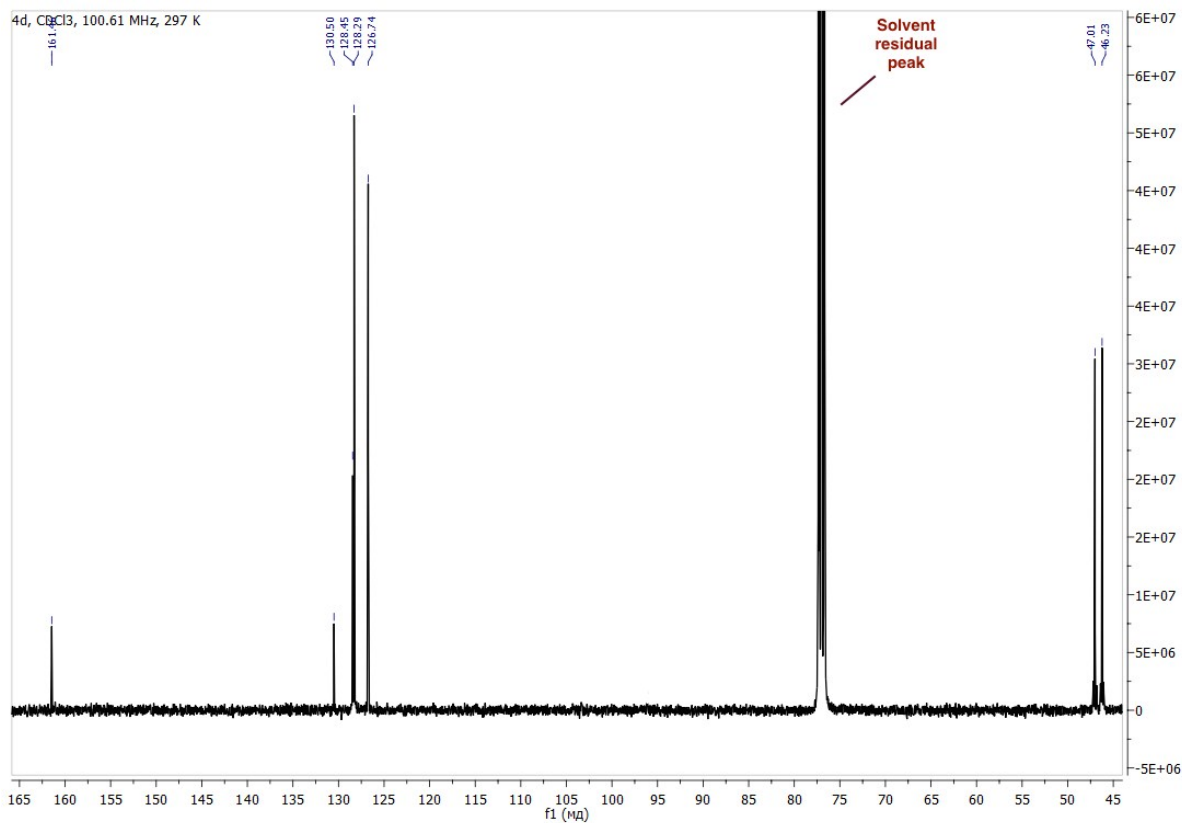

Figure S37.  $^{13}\text{C}\{^1\text{H}\}$  NMR spectrum of **4d**.

4e

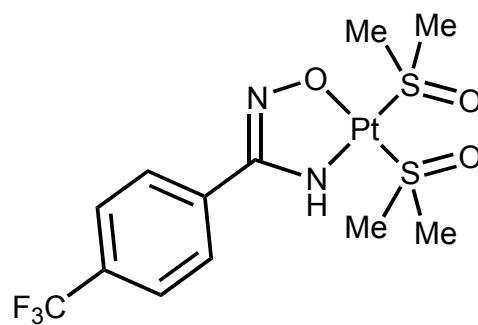

Acquisition Parameter

|             |            |                      |          |                  |           |
|-------------|------------|----------------------|----------|------------------|-----------|
| Source Type | ESI        | Ion Polarity         | Positive | Set Nebulizer    | 0.4 Bar   |
| Focus       | Not active | Set Capillary        | 4500 V   | Set Dry Heater   | 180 °C    |
| Scan Begin  | 50 m/z     | Set End Plate Offset | -500 V   | Set Dry Gas      | 4.0 l/min |
| Scan End    | 3000 m/z   |                      |          | Set Divert Valve | Source    |

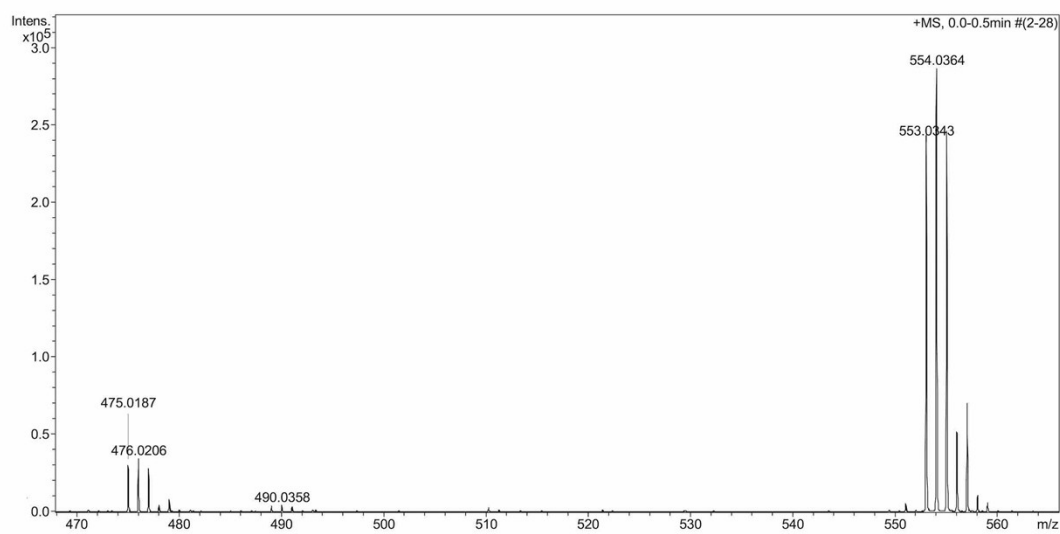

Figure S38. HR ESI<sup>+</sup>-MS spectrum of 4e.

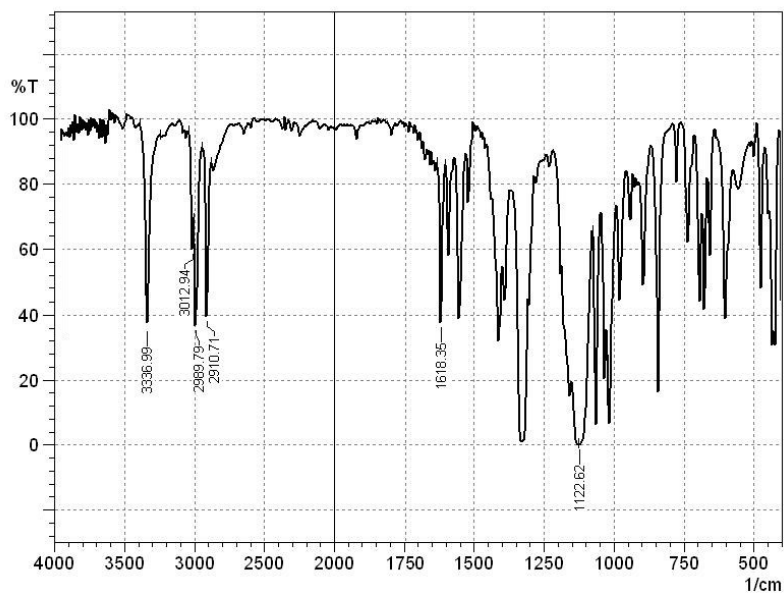

Figure S39. IR spectrum of 4e.

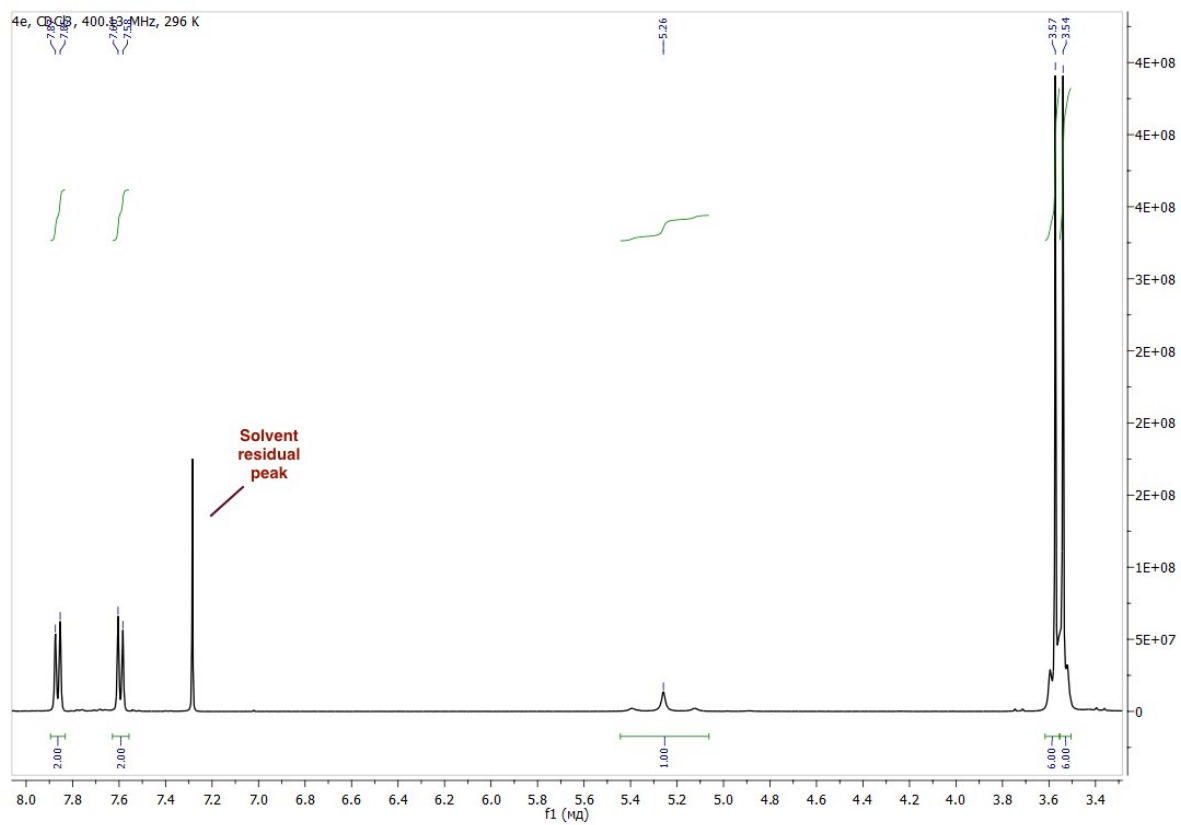

Figure S40. <sup>1</sup>H NMR spectrum of 4e.

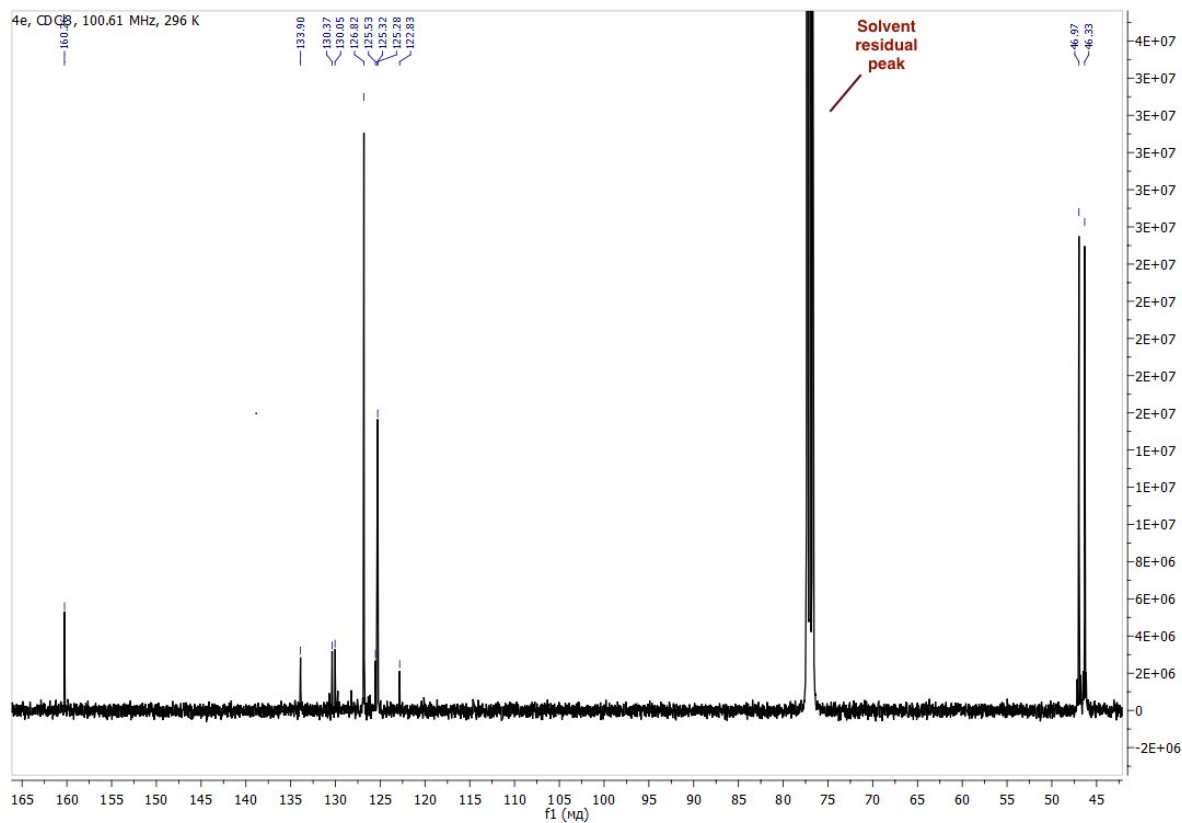

Figure S41. <sup>13</sup>C{<sup>1</sup>H} NMR spectrum of 4e.

4f

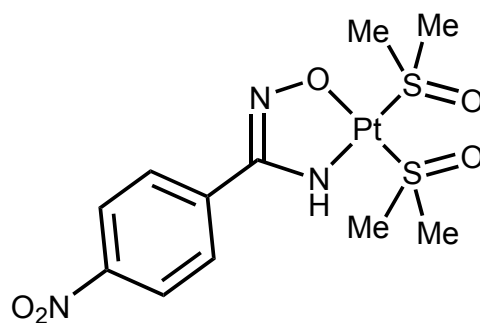

Acquisition Parameter

|             |            |                      |          |                  |           |
|-------------|------------|----------------------|----------|------------------|-----------|
| Source Type | ESI        | Ion Polarity         | Positive | Set Nebulizer    | 0.8 Bar   |
| Focus       | Not active | Set Capillary        | 4500 V   | Set Dry Heater   | 180 °C    |
| Scan Begin  | 50 m/z     | Set End Plate Offset | -500 V   | Set Dry Gas      | 8.0 l/min |
| Scan End    | 3000 m/z   |                      |          | Set Divert Valve | Source    |

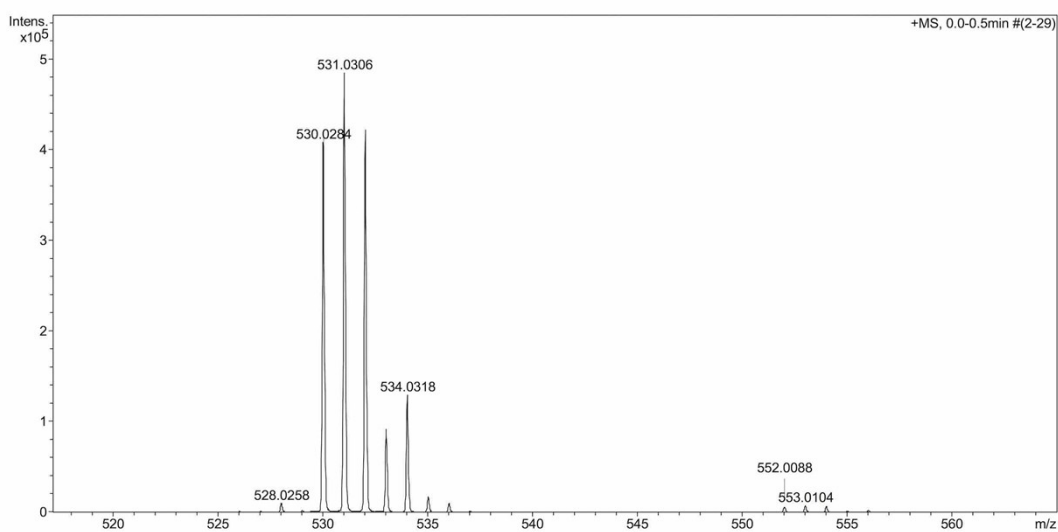

Figure S42. HR ESI<sup>+</sup>-MS spectrum of 4f.

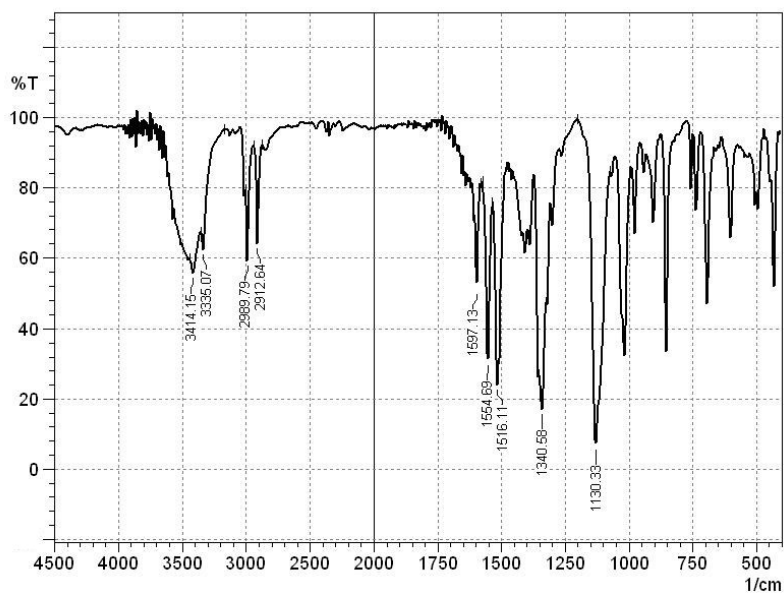

Figure S43. IR spectrum of 4f.



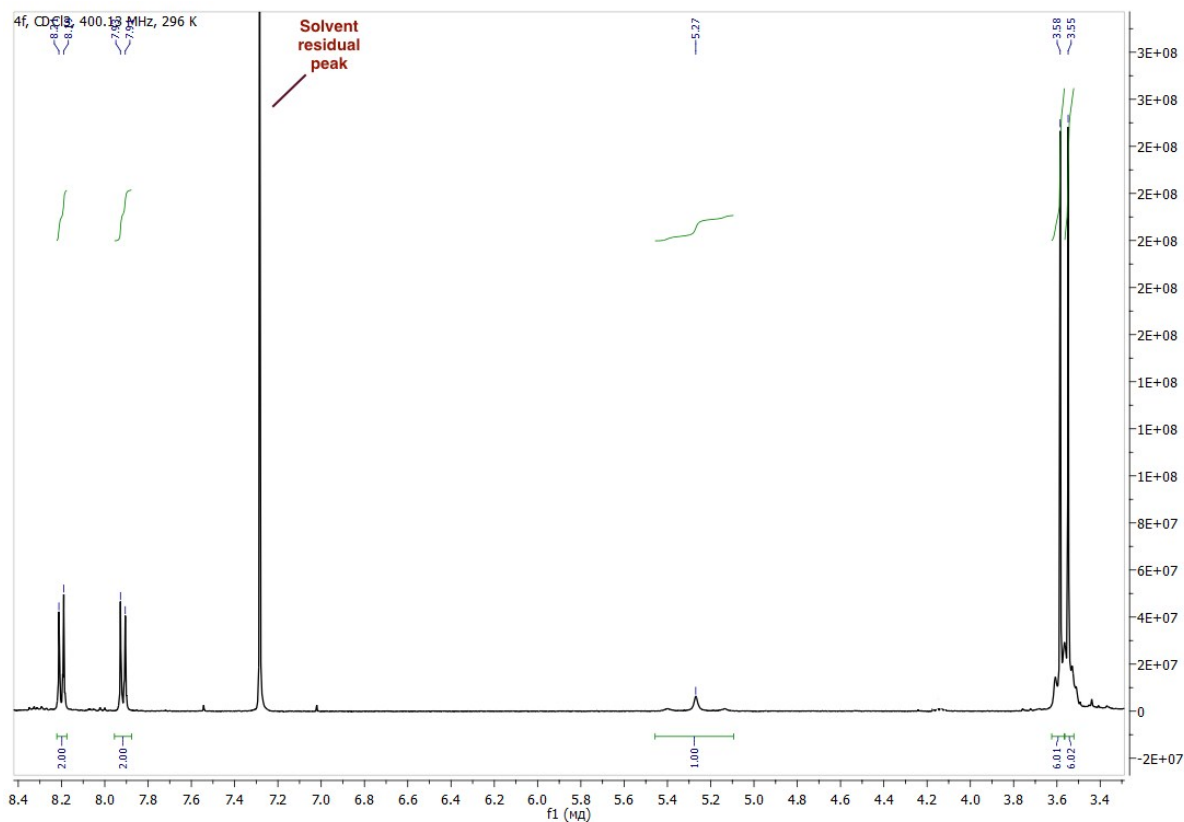

Figure S44. <sup>1</sup>H NMR spectrum of **4f**.

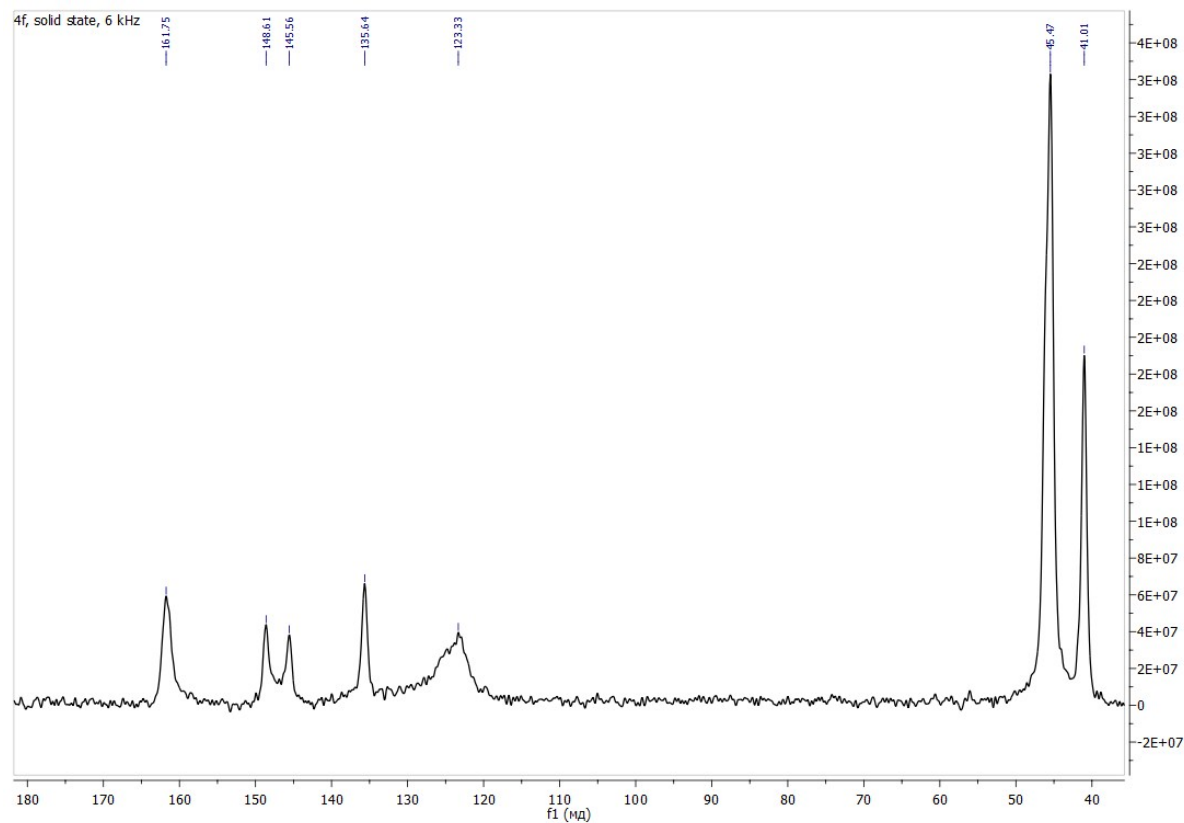

Figure S45. CP-MAS TOSS <sup>13</sup>C{<sup>1</sup>H} NMR spectrum of **4f**.

4g

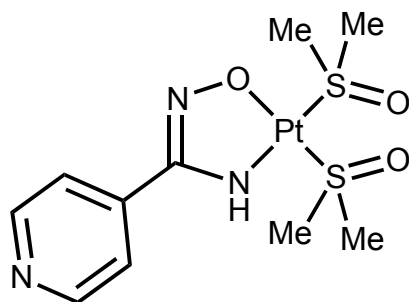

**Acquisition Parameter**

|             |            |                      |          |                  |           |
|-------------|------------|----------------------|----------|------------------|-----------|
| Source Type | ESI        | Ion Polarity         | Positive | Set Nebulizer    | 0.8 Bar   |
| Focus       | Not active | Set Capillary        | 4500 V   | Set Dry Heater   | 180 °C    |
| Scan Begin  | 50 m/z     | Set End Plate Offset | -500 V   | Set Dry Gas      | 8.0 l/min |
| Scan End    | 3000 m/z   |                      |          | Set Divert Valve | Source    |

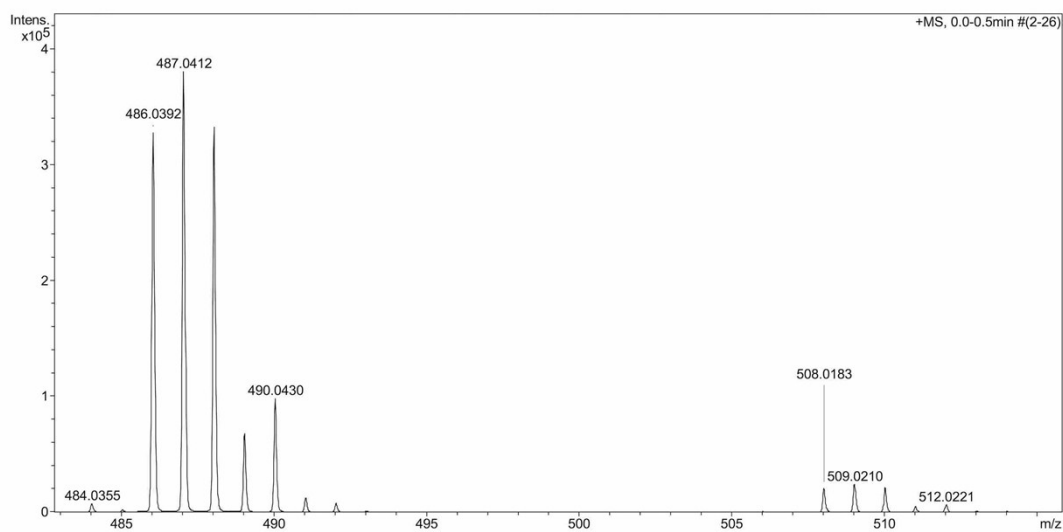

**Figure S46.** HR ESI<sup>+</sup>-MS spectrum of 4g.

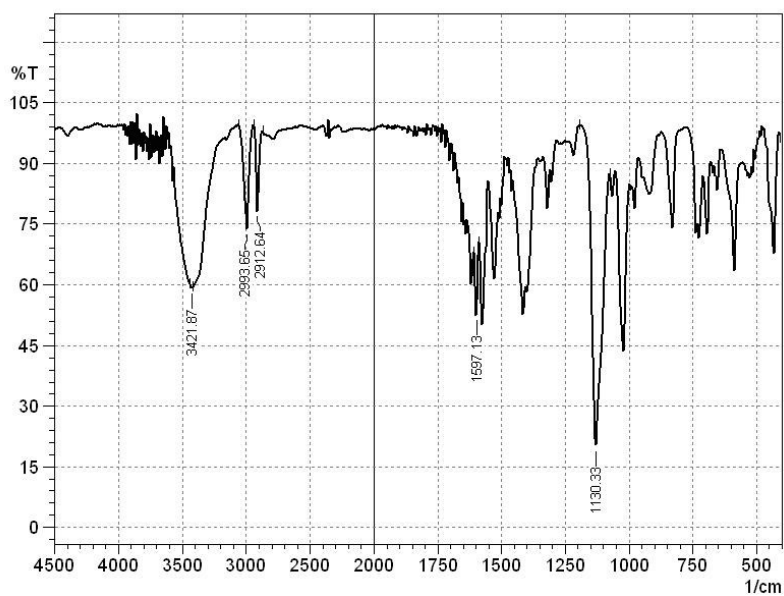

**Figure S47.** IR spectrum of 4g.

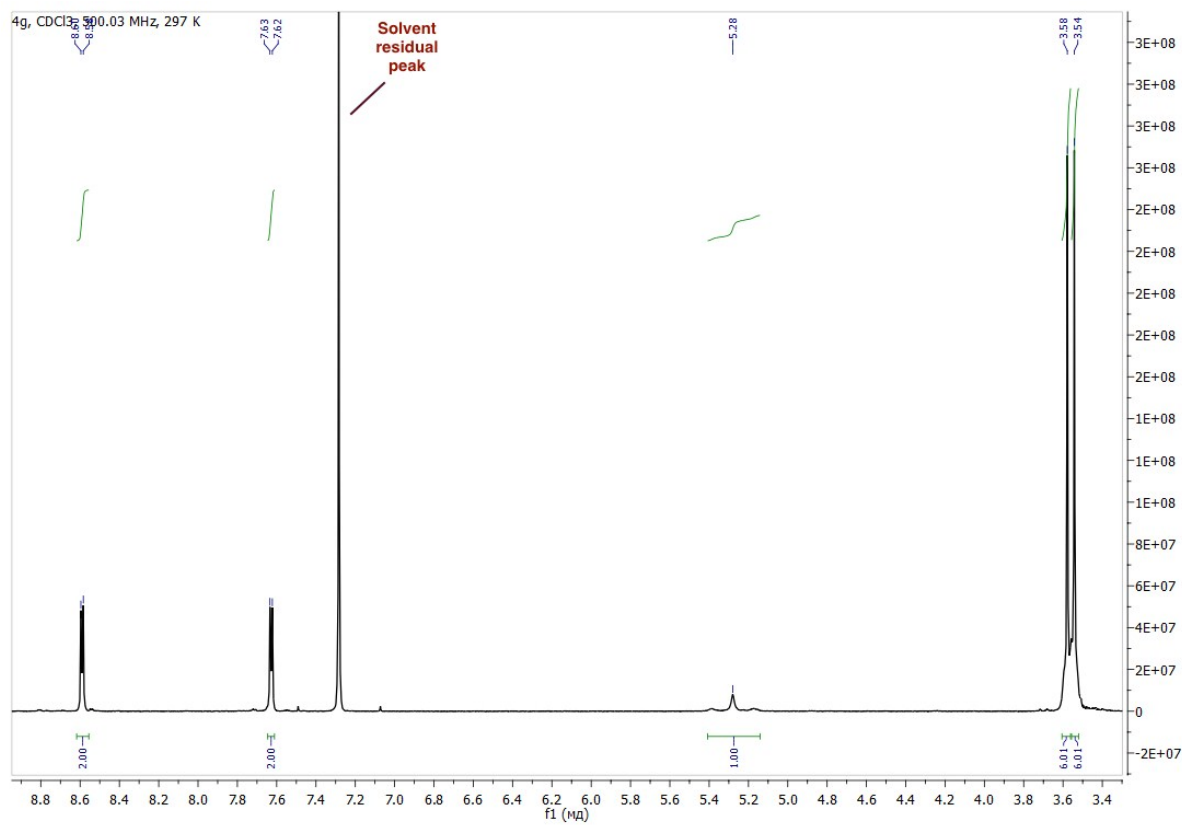

Figure S48. <sup>1</sup>H NMR spectrum of **4g**.

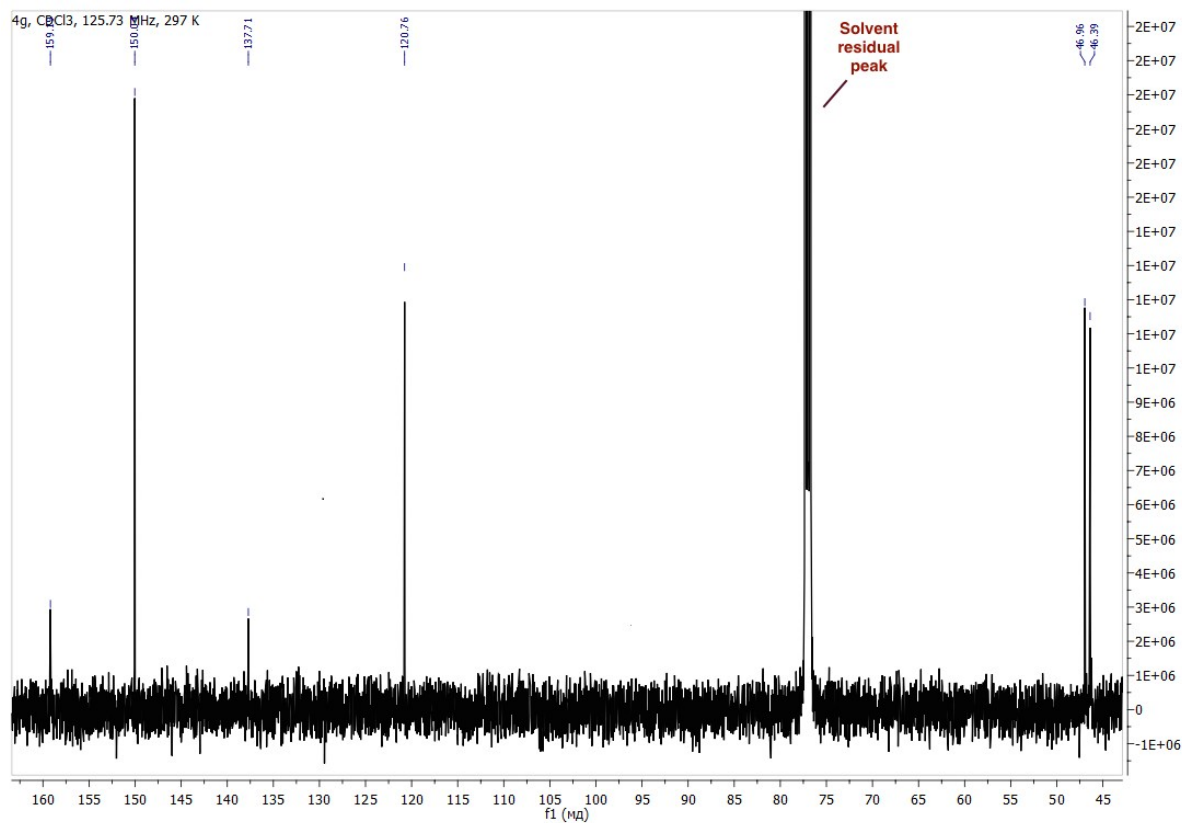

Figure S49. <sup>13</sup>C{<sup>1</sup>H} NMR spectrum of **4g**.

**Table S1.** Crystal data for **3a–b** and **3d–e**.

| Identification code                         | <b>3a</b>                                                                        | <b>3b</b>                                                                        | <b>3d</b>                                                                         | <b>3e</b>                                                                                        |
|---------------------------------------------|----------------------------------------------------------------------------------|----------------------------------------------------------------------------------|-----------------------------------------------------------------------------------|--------------------------------------------------------------------------------------------------|
| Empirical formula                           | C <sub>4</sub> H <sub>12</sub> Cl <sub>2</sub> N <sub>2</sub> O <sub>2</sub> PtS | C <sub>5</sub> H <sub>14</sub> Cl <sub>2</sub> N <sub>2</sub> O <sub>2</sub> PtS | C <sub>10</sub> H <sub>18</sub> Cl <sub>2</sub> N <sub>2</sub> O <sub>3</sub> PtS | C <sub>10</sub> H <sub>13</sub> Cl <sub>2</sub> F <sub>3</sub> N <sub>2</sub> O <sub>2</sub> PtS |
| Formula weight                              | 418.21                                                                           | 432.23                                                                           | 512.31                                                                            | 548.27                                                                                           |
| Temperature/K                               | 100(2)                                                                           | 100(2)                                                                           | 100(2)                                                                            | 100(2)                                                                                           |
| Crystal system                              | monoclinic                                                                       | triclinic                                                                        | monoclinic                                                                        | triclinic                                                                                        |
| Space group                                 | P2 <sub>1</sub> /c                                                               | P-1                                                                              | P2 <sub>1</sub> /c                                                                | P-1                                                                                              |
| a/Å                                         | 8.0458(6)                                                                        | 7.7950(7)                                                                        | 7.7751(2)                                                                         | 7.1487(4)                                                                                        |
| b/Å                                         | 11.8336(7)                                                                       | 8.6094(9)                                                                        | 15.9278(5)                                                                        | 8.9180(5)                                                                                        |
| c/Å                                         | 12.2420(15)                                                                      | 9.4837(9)                                                                        | 13.8379(4)                                                                        | 13.5059(9)                                                                                       |
| α/°                                         | 90                                                                               | 99.166(8)                                                                        | 90                                                                                | 82.385(5)                                                                                        |
| β/°                                         | 112.759(8)                                                                       | 91.628(8)                                                                        | 103.110(3)                                                                        | 87.679(5)                                                                                        |
| γ/°                                         | 90                                                                               | 114.355(9)                                                                       | 90                                                                                | 66.909(6)                                                                                        |
| Volume/Å <sup>3</sup>                       | 1074.82(18)                                                                      | 569.26(10)                                                                       | 1669.01(8)                                                                        | 785.01(9)                                                                                        |
| Z                                           | 4                                                                                | 2                                                                                | 4                                                                                 | 2                                                                                                |
| ρ <sub>calc</sub> /cm <sup>3</sup>          | 2.584                                                                            | 2.522                                                                            | 2.039                                                                             | 2.320                                                                                            |
| μ/mm <sup>-1</sup>                          | 13.712                                                                           | 12.950                                                                           | 8.856                                                                             | 9.444                                                                                            |
| F(000)                                      | 776.0                                                                            | 404.0                                                                            | 976.0                                                                             | 516.0                                                                                            |
| Crystal size/mm <sup>3</sup>                | 0.2 × 0.15 × 0.15                                                                | 0.25 × 0.25 × 0.2                                                                | 0.2 × 0.2 × 0.15                                                                  | 0.15 × 0.1 × 0.1                                                                                 |
| Radiation                                   | MoKα (λ = 0.71073)                                                               | MoKα (λ = 0.71073)                                                               | MoKα (λ = 0.71073)                                                                | MoKα (λ = 0.71073)                                                                               |
| 2θ range for data collection/°              | 5.49 to 54.976                                                                   | 5.288 to 55                                                                      | 5.38 to 54.994                                                                    | 5.006 to 54.99                                                                                   |
| Index ranges                                | -10 ≤ h ≤ 9, -15 ≤ k ≤ 15, -15 ≤ l ≤ 15                                          | -8 ≤ h ≤ 10, -11 ≤ k ≤ 10, -11 ≤ l ≤ 12                                          | -10 ≤ h ≤ 7, -10 ≤ k ≤ 20, -17 ≤ l ≤ 17                                           | -9 ≤ h ≤ 9, -11 ≤ k ≤ 11, -17 ≤ l ≤ 17                                                           |
| Reflections collected                       | 8752                                                                             | 4656                                                                             | 7727                                                                              | 12183                                                                                            |
| Independent reflections                     | 2472 [R <sub>int</sub> = 0.0556, R <sub>sigma</sub> = 0.0530]                    | 2607 [R <sub>int</sub> = 0.0265, R <sub>sigma</sub> = 0.0456]                    | 3821 [R <sub>int</sub> = 0.0276, R <sub>sigma</sub> = 0.0444]                     | 3602 [R <sub>int</sub> = 0.0345, R <sub>sigma</sub> = 0.0392]                                    |
| Data/restraints/parameters                  | 2472/0/112                                                                       | 2607/6/139                                                                       | 3821/0/177                                                                        | 3602/0/193                                                                                       |
| Goodness-of-fit on F <sup>2</sup>           | 1.020                                                                            | 1.038                                                                            | 1.066                                                                             | 1.023                                                                                            |
| Final R indexes [I >= 2σ (I)]               | R <sub>1</sub> = 0.0273, wR <sub>2</sub> = 0.0503                                | R <sub>1</sub> = 0.0311, wR <sub>2</sub> = 0.0657                                | R <sub>1</sub> = 0.0252, wR <sub>2</sub> = 0.0475                                 | R <sub>1</sub> = 0.0222, wR <sub>2</sub> = 0.0450                                                |
| Final R indexes [all data]                  | R <sub>1</sub> = 0.0376, wR <sub>2</sub> = 0.0545                                | R <sub>1</sub> = 0.0342, wR <sub>2</sub> = 0.0679                                | R <sub>1</sub> = 0.0312, wR <sub>2</sub> = 0.0497                                 | R <sub>1</sub> = 0.0270, wR <sub>2</sub> = 0.0461                                                |
| Largest diff. peak/hole / e Å <sup>-3</sup> | 1.32/-1.64                                                                       | 1.93/-2.50                                                                       | 1.21/-0.82                                                                        | 1.07/-0.87                                                                                       |
| CCDC number                                 | <b>1475389</b>                                                                   | <b>1475381</b>                                                                   | <b>1475378</b>                                                                    | <b>1475377</b>                                                                                   |

**Table S2.** Crystal data for **3f**, **4c**, **4f** and **[2cH][PtCl<sub>3</sub>(Me<sub>2</sub>SO)]**.

| Identification code                         | <b>3f</b>                                                                        | <b>4c</b>                                                                     | <b>4f</b>                                                                      | <b>by-product_3c</b>                                                             |
|---------------------------------------------|----------------------------------------------------------------------------------|-------------------------------------------------------------------------------|--------------------------------------------------------------------------------|----------------------------------------------------------------------------------|
| Empirical formula                           | C <sub>9</sub> H <sub>13</sub> Cl <sub>2</sub> N <sub>3</sub> O <sub>4</sub> PtS | C <sub>9</sub> H <sub>22</sub> N <sub>2</sub> O <sub>3</sub> PtS <sub>2</sub> | C <sub>11</sub> H <sub>17</sub> N <sub>3</sub> O <sub>5</sub> PtS <sub>2</sub> | C <sub>7</sub> H <sub>19</sub> Cl <sub>3</sub> N <sub>2</sub> O <sub>2</sub> PtS |
| Formula weight                              | 525.27                                                                           | 465.49                                                                        | 530.48                                                                         | 496.74                                                                           |
| Temperature/K                               | 100(2)                                                                           | 100(2)                                                                        | 100(2)                                                                         | 100(2)                                                                           |
| Crystal system                              | triclinic                                                                        | orthorhombic                                                                  | triclinic                                                                      | monoclinic                                                                       |
| Space group                                 | P-1                                                                              | Cmce                                                                          | P-1                                                                            | P2 <sub>1</sub> /c                                                               |
| a/Å                                         | 7.0238(3)                                                                        | 9.3250(8)                                                                     | 8.7261(2)                                                                      | 6.5859(2)                                                                        |
| b/Å                                         | 9.0811(4)                                                                        | 18.8767(15)                                                                   | 10.2167(3)                                                                     | 19.2634(7)                                                                       |
| c/Å                                         | 12.9083(3)                                                                       | 17.497(2)                                                                     | 18.8842(4)                                                                     | 12.7960(5)                                                                       |
| α/°                                         | 91.147(3)                                                                        | 90                                                                            | 74.480(2)                                                                      | 90                                                                               |
| β/°                                         | 94.584(3)                                                                        | 90                                                                            | 80.247(2)                                                                      | 116.115(3)                                                                       |
| γ/°                                         | 111.834(4)                                                                       | 90                                                                            | 87.869(2)                                                                      | 90                                                                               |
| Volume/Å <sup>3</sup>                       | 760.73(5)                                                                        | 3079.9(5)                                                                     | 1598.67(8)                                                                     | 1457.66(10)                                                                      |
| Z                                           | 2                                                                                | 8                                                                             | 4                                                                              | 4                                                                                |
| ρ <sub>calc</sub> /cm <sup>3</sup>          | 2.293                                                                            | 2.008                                                                         | 2.204                                                                          | 2.264                                                                            |
| μ/mm <sup>-1</sup>                          | 9.724                                                                            | 9.382                                                                         | 19.111                                                                         | 10.308                                                                           |
| F(000)                                      | 496.0                                                                            | 1792.0                                                                        | 1016.0                                                                         | 944.0                                                                            |
| Crystal size/mm <sup>3</sup>                | 0.3 × 0.3 × 0.2                                                                  | 0.3 × 0.15 × 0.15                                                             | 0.35 × 0.12 × 0.06                                                             | 0.1 × 0.1 × 0.1                                                                  |
| Radiation                                   | MoKα (λ = 0.71073)                                                               | MoKα (λ = 0.71073)                                                            | CuKα (λ = 1.54184)                                                             | MoKα (λ = 0.71073)                                                               |
| 2θ range for data collection/°              | 5.642 to 54.996                                                                  | 5.4 to 54.948                                                                 | 8.984 to 149.968                                                               | 5.52 to 54.992                                                                   |
| Index ranges                                | -9 ≤ h ≤ 9, -11 ≤ k ≤ 11, -16 ≤ l ≤ 16                                           | -12 ≤ h ≤ 6, -24 ≤ k ≤ 24, -12 ≤ l ≤ 21                                       | -10 ≤ h ≤ 10, -12 ≤ k ≤ 12, -20 ≤ l ≤ 23                                       | -6 ≤ h ≤ 8, -25 ≤ k ≤ 17, -16 ≤ l ≤ 15                                           |
| Reflections collected                       | 34901                                                                            | 5640                                                                          | 24766                                                                          | 7442                                                                             |
| Independent reflections                     | 3488 [R <sub>int</sub> = 0.0655, R <sub>sigma</sub> = 0.0289]                    | 1809 [R <sub>int</sub> = 0.0234, R <sub>sigma</sub> = 0.0239]                 | 6576 [R <sub>int</sub> = 0.0576, R <sub>sigma</sub> = 0.0434]                  | 3352 [R <sub>int</sub> = 0.0284, R <sub>sigma</sub> = 0.0391]                    |
| Data/restraints/parameters                  | 3488/0/184                                                                       | 1809/0/97                                                                     | 6576/0/399                                                                     | 3352/0/150                                                                       |
| Goodness-of-fit on F <sup>2</sup>           | 1.055                                                                            | 1.121                                                                         | 1.084                                                                          | 1.050                                                                            |
| Final R indexes [I ≥ 2σ (I)]                | R <sub>1</sub> = 0.0208, wR <sub>2</sub> = 0.0438                                | R <sub>1</sub> = 0.0245, wR <sub>2</sub> = 0.0597                             | R <sub>1</sub> = 0.0313, wR <sub>2</sub> = 0.0760                              | R <sub>1</sub> = 0.0234, wR <sub>2</sub> = 0.0444                                |
| Final R indexes [all data]                  | R <sub>1</sub> = 0.0224, wR <sub>2</sub> = 0.0444                                | R <sub>1</sub> = 0.0282, wR <sub>2</sub> = 0.0615                             | R <sub>1</sub> = 0.0377, wR <sub>2</sub> = 0.0812                              | R <sub>1</sub> = 0.0292, wR <sub>2</sub> = 0.0462                                |
| Largest diff. peak/hole / e Å <sup>-3</sup> | 1.27/-1.20                                                                       | 2.75/-1.15                                                                    | 1.75/-1.47                                                                     | 1.77/-0.96                                                                       |
| CCDC number                                 | <b>1475399</b>                                                                   | <b>1475400</b>                                                                | <b>1475683</b>                                                                 | <b>1475446</b>                                                                   |

Concentration-effect curves of 3b, 3d-e and 4c-e

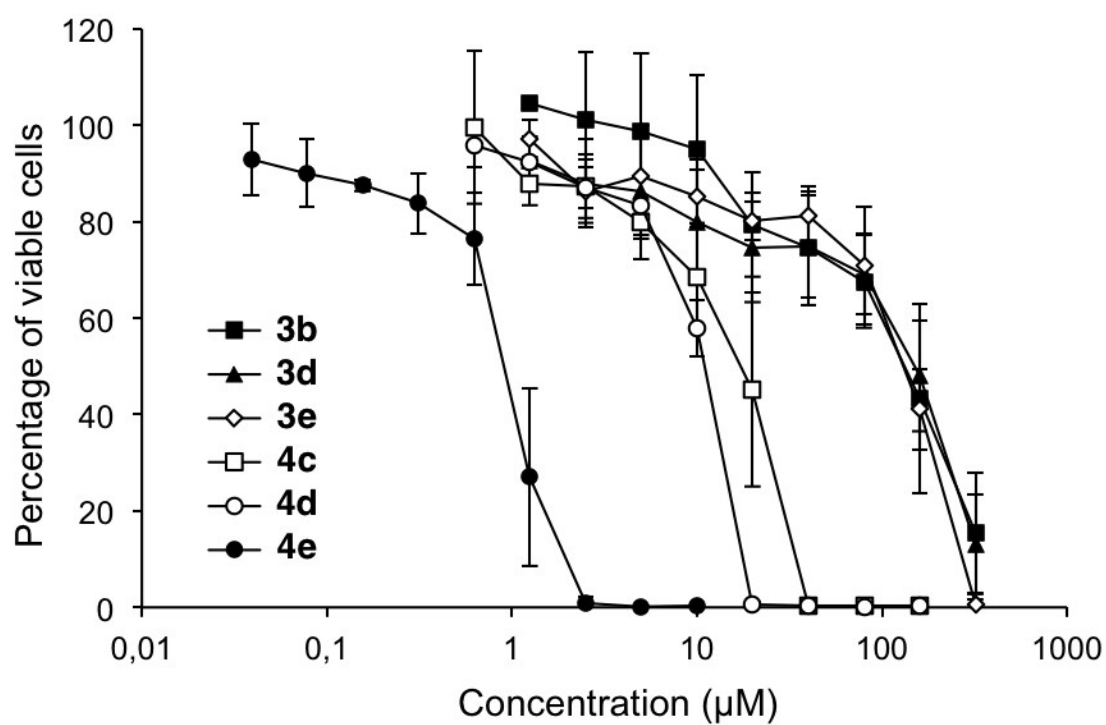

Figure S50. Concentration-effect curves of 3b, 3d-e and 4c-e in CH1/PA-1 cells.

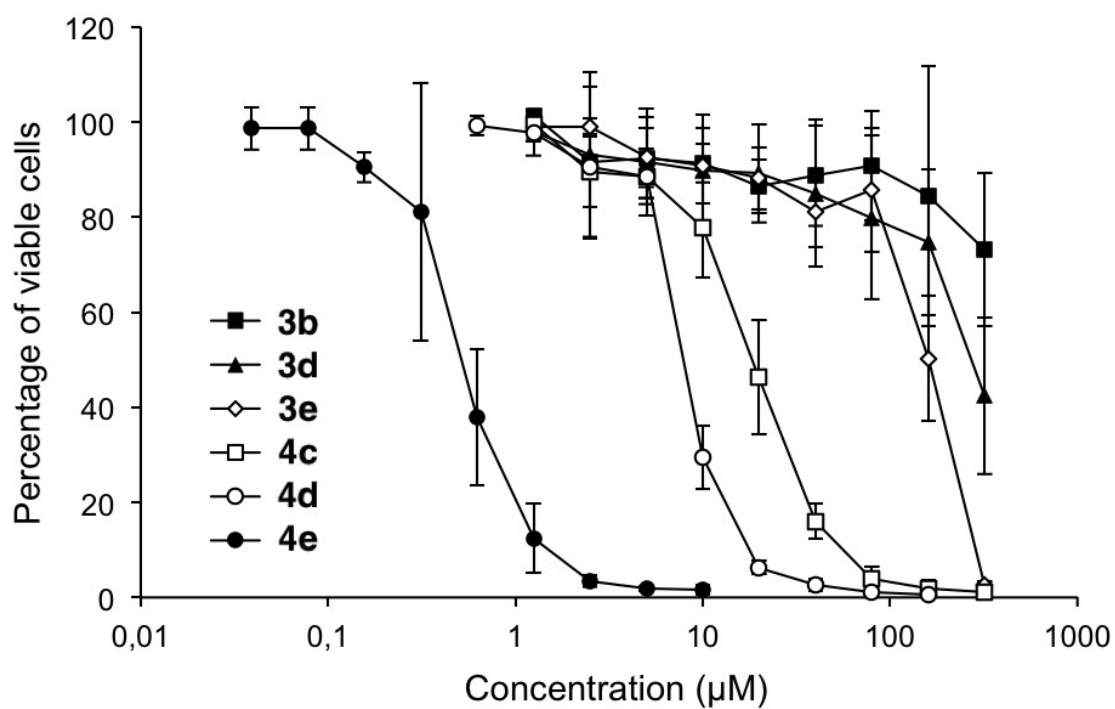

Figure S51. Concentration-effect curves of 3b, 3d-e and 4c-e in SW480 cells.

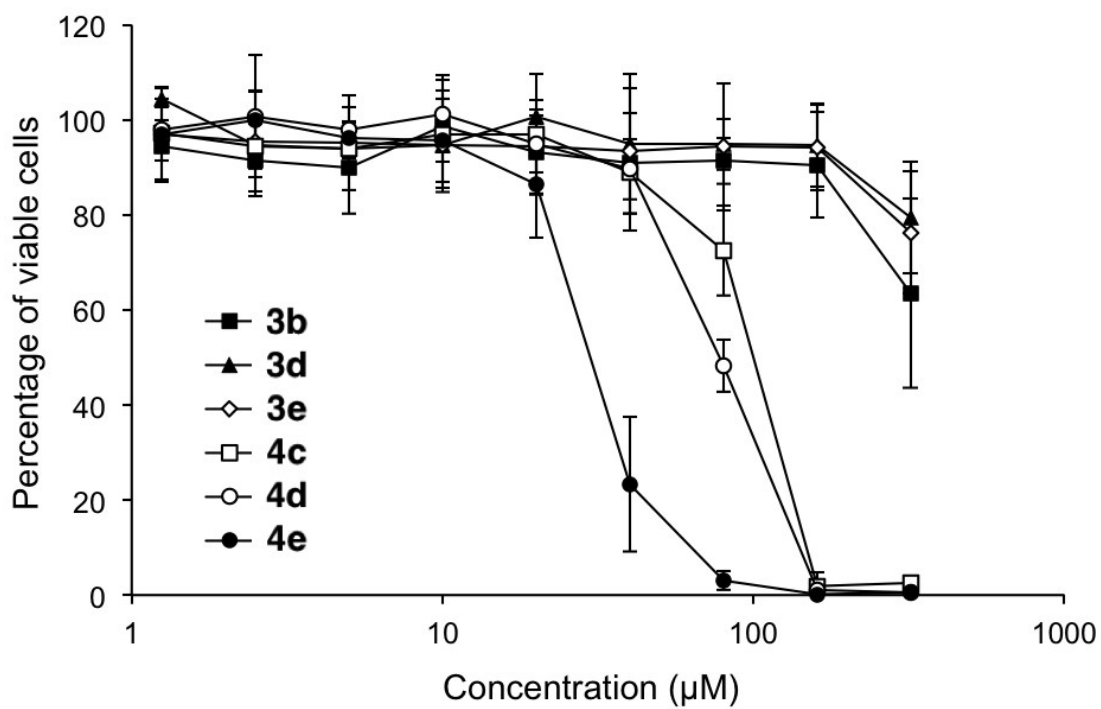

Figure S52. Concentration-effect curves of **3b**, **3d–e** and **4c–e** in A549 cells.

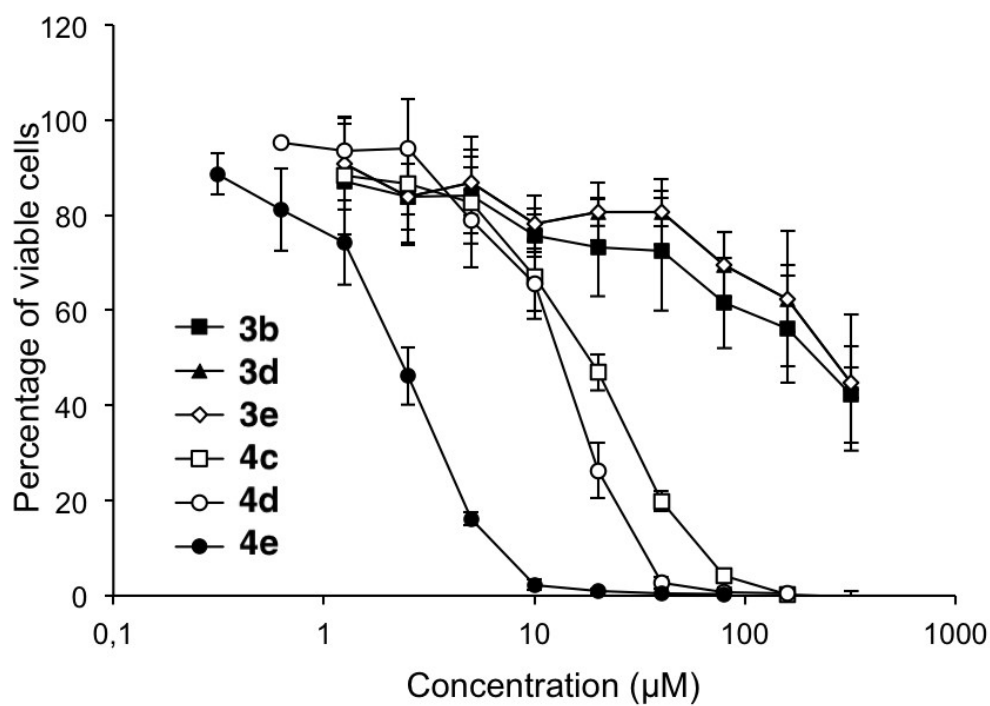

Figure S53. Concentration-effect curves of **3b**, **3d–e** and **4c–e** in SKBR3 cells.
